# A majority of HIV persistence during antiretroviral therapy is due to infected cell proliferation

Daniel B. Reeves<sup>1</sup>, Elizabeth R. Duke<sup>1,2</sup>, Thor A. Wagner<sup>3,4</sup>, Sarah E. Palmer<sup>5</sup>, Adam M. Spivak<sup>6</sup>, Joshua T. Schiffer<sup>1,2,7\*</sup>

<sup>1</sup>Vaccine and Infectious Diseases Division, Fred Hutchinson Cancer Research Center, 1100 Fairview Ave. Seattle, WA 98122, USA

<sup>2</sup>Department of Medicine, University of Washington, 1959 NE Pacific St. Seattle, WA 98195, USA

<sup>3</sup>Department of Pediatrics, University of Washington, 1959 NE Pacific St. Seattle, WA 98195, USA

<sup>4</sup>Center for Global Infectious Disease Research, Seattle Children's Research Institute, 1900 9th Ave, Seattle, WA 98101, USA

<sup>5</sup>Centre for Virus Research, The Westmead Institute for Medical Research, 176 Hawkesbury Rd, Westmead NSW 2145, Australia

<sup>6</sup>Department of Medicine, University of Utah, 30 N 1900 E, Salt Lake City, UT 84132, USA

<sup>7</sup>Clinical Research Division, Fred Hutchinson Cancer Research Center, 1100 Fairview Ave. Seattle, WA 98122, USA

\*Corresponding author, email: [jschiffe@fhcrc.org](mailto:jschiffe@fhcrc.org) (JTS)

## Abstract

Antiretroviral therapy (ART) suppresses viral replication in people living with HIV. Yet, infected cells persist for decades on ART and viremia returns if ART is stopped. Persistence has been attributed to viral replication in an ART sanctuary and long-lived and/or proliferating latently infected cells. Using ecological methods and existing data, we infer that >99% of infected cells are members of clonal populations after one year of ART. We reconcile our results with observations from the first months of ART, demonstrating mathematically how a “fossil record” of historic HIV replication permits observed viral evolution even while most new infected cells arise from proliferation. Together, our results imply cellular proliferation generates a majority of infected cells during ART. Therefore, reducing proliferation could decrease the size of the HIV reservoir and help achieve a functional cure.

## Introduction

Antiretroviral therapy (ART) limits HIV replication in previously uninfected cells leading to elimination of most infected CD4<sup>+</sup> T cells.<sup>1</sup> Yet, some infected cells persist and are cleared from the body at an extremely slow rate despite decades of treatment.<sup>2,3</sup> There is debate whether infection remains due to HIV replication within a small population of cells<sup>4,5</sup> or due to persistence of memory CD4<sup>+</sup> T cells with HIV integrated into human chromosomal DNA.<sup>3,6,7</sup> If the latter mechanism predominates, prolonged cellular lifespan and/or frequent cellular proliferation may sustain stable numbers of infected cells.

To optimize HIV cure strategies, mechanisms sustaining infection must be understood. Persistent viral replication in a “sanctuary” where ART levels are inadequate implies a need to improve ART delivery.<sup>8</sup> If HIV persists without replication as a *latent reservoir* of memory CD4<sup>+</sup> T cells, then the survival mechanisms of these cells are ideal therapeutic targets. Infected cell longevity might be addressed by reactivating the lytic HIV replication cycle<sup>9</sup> and strengthening the anti-HIV cytolytic immune response,

42 leading to premature cellular demise. Anti-proliferative therapies could limit homeostatic or antigen  
43 driven proliferation.<sup>10-12</sup>

44  
45 These competing hypotheses have been studied by analyzing HIV evolutionary dynamics. Due to the  
46 high mutation rate of HIV reverse transcriptase and the large viral population size,<sup>13</sup> HIV replication in  
47 the absence of ART produces large viral diversity.<sup>13-15</sup> Over time, new strains become dominant due to  
48 continuous positive immunologic selection pressure against the virus. Repeated “selective sweeps”  
49 cause genetic divergence, or a positive molecular evolution rate,<sup>16</sup> often measured by continual growth  
50 in genetic distance between the consensus strain and the founder virus.<sup>17-19</sup>

51  
52 A recent study documented new HIV mutants during months 0-6 of ART in three participants at a rate  
53 equivalent to pre-ART time points. New mutations were noted across multiple anatomic compartments,  
54 implying widespread circulation of evolving strains.<sup>4</sup> One possible explanation for this data is the  
55 presence of a drug sanctuary in which ART levels are insufficient to stop new infection events.  
56 Alternative proposed interpretations are experimental error related to PCR resampling, or variable  
57 cellular age structure within the phylogenetic trees.<sup>20,21</sup>

58  
59 In other studies of participants on more prolonged ART (at least one year), viral evolution was not  
60 observed despite sampling of multiple anatomic compartments.<sup>22-25</sup> Identical HIV DNA sequences were  
61 noted in samples obtained years apart,<sup>14,26,27</sup> suggesting long-lived latently infected cells as a possible  
62 mechanism of HIV persistence.<sup>3,6,7,24,25</sup> Clonal expansions of identical HIV DNA sequences were also  
63 observed, demonstrating that cellular proliferation generates new infected cells.<sup>4,12,24,28-30</sup> Multiple,  
64 equivalent sequences were noted in blood, gut-associated lymphoid tissue (GALT), and lymph nodes,  
65 even during the first month of ART.<sup>24,29,30</sup>

66  
67 The majority of these studies relied on sequencing single genes including *env*, *gag* and *pol*: this approach  
68 may overestimate HIV clonality because mutations in other genome segments could go unobserved.<sup>17,31</sup>  
69 In addition, these studies also measured total HIV DNA. However, a majority of HIV DNA sequences have  
70 incurred deleterious mutations and do not constitute the true replication competent HIV reservoir.<sup>32,33</sup>  
71 To address these issues, a more recent study utilized a comprehensive, whole-genome sequencing  
72 approach to confirm the presence of abundant replication competent sequence clones.<sup>34</sup> In a separate  
73 cohort of patients, rebounding HIV sequences arose from replication competent clonal populations.<sup>35</sup>

74  
75 Another approach to define HIV clonality involves sequencing of the HIV integration site within human  
76 chromosomal DNA.<sup>36-40</sup> While HIV tends to integrate into the same genes,<sup>39,41</sup> it is extremely unlikely that  
77 two cellular infection events would result in HIV integration within precisely the same human  
78 chromosomal locus by chance alone.<sup>37</sup> Thus, integration site analyses abrogate the challenge of  
79 overestimating clonality due to incomplete sequencing and provide an elegant surrogate for whole  
80 genome sequencing. Previous studies of integration sites found significant numbers of repeated  
81 integration sites, providing strong evidence that these infected cells arose from cellular proliferation.<sup>42,43</sup>  
82 These studies are not absolutely conclusive for HIV persistence because integration site sequencing  
83 cannot confirm or deny replication competency of the integrated virus.<sup>39</sup>

84  
85 While HIV sequence clonality has been widely observed, existing studies observed equivalent sequences  
86 in a minority (<50%) of observed sequences. Here, we demonstrate that this finding can be explained by  
87 incomplete sampling. Using tools adapted from ecology and data from two integration site studies<sup>36,37</sup>  
88 and a replication competent HIV DNA study,<sup>34</sup> we show that nearly all observed unique sequences are

89 likely to be members of clonal populations which derived from cellular proliferation. We predict that the  
90 HIV reservoir consists of a small number of massive clones, and a massive number of small clones.

91  
92 Based on these results, we used a mechanistic mathematical model to reconcile apparent evolution  
93 during the early months of ART with apparent clonality after a year or more of ART. The model includes  
94 the major proposed mechanisms for HIV persistence: a drug sanctuary, long-lived infected cells, and  
95 proliferating infected cells. The model highlights that observed HIV evolution during the first 6 months  
96 of ART can be caused by serial observations of long-lived (or proliferated) cells that were once generated  
97 by viral replication. We suggest sampling sequences during early ART may result in detection of a  
98 positive molecular evolution rate due to the “fossil record” of past infections rather than current viral  
99 replication in a drug sanctuary. Based on observed cellular rates, model output after one week of ART  
100 shows that a majority of new infected cells are generated by proliferation.

101  
102 While it remains impossible to rule out a completely unobserved drug sanctuary, our combined  
103 approaches suggest that cellular proliferation predominantly drives observed HIV persistence on ART.  
104 Consequently, anti-proliferative therapies embody a meaningful therapeutic approach for HIV cure.

## 105 **Results**

106 **Defining genetic markers of HIV persistence.** During untreated infection, HIV integrates its DNA copy  
107 into human chromosomal DNA in each infected CD4+ T cell.<sup>44</sup> A majority of new infections are marked  
108 by novel mutations due to the high error rate of HIV reverse transcriptase and integration into a unique  
109 chromosomal location (**Fig 1**). Therefore, continual accrual of new mutations during ART would suggest  
110 that ongoing viral replication, perhaps due to inadequate drug delivery to certain micro-anatomic  
111 regions, allows HIV to persist during ART.

112  
113 In a subset of infected CD4+ T cells, HIV replication does not progress beyond chromosomal integration  
114 and the virus enters latency.<sup>44</sup> If the same HIV sequences (or integration sites) are found over long time  
115 intervals, either cellular longevity or proliferation of latently infected cells allowed HIV to persist. If  
116 equivalent HIV sequences with identical chromosomal integration sites are identified in multiple cells,  
117 then these viruses were generated via cellular proliferation, rather than HIV replication (**Fig 1**).

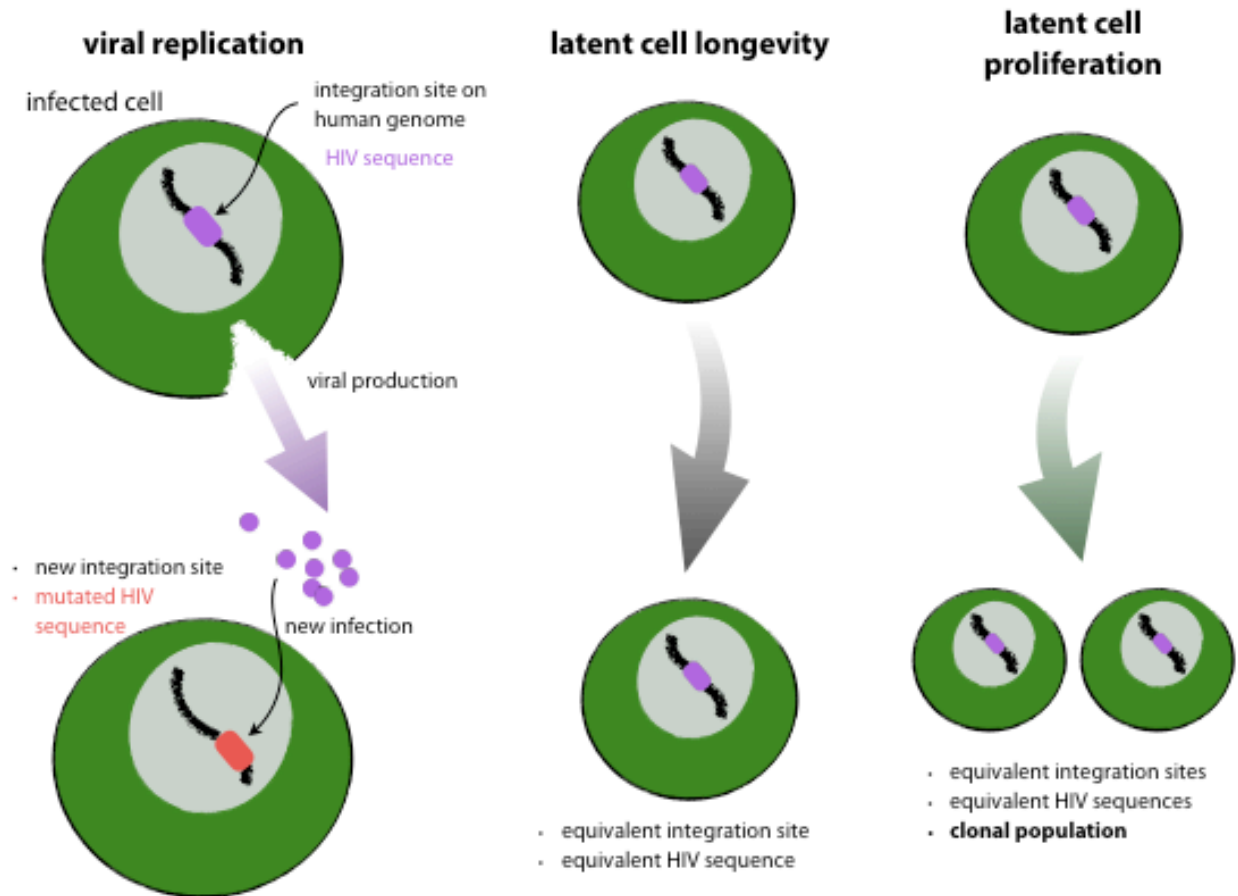

118  
119 **Figure 1. Possible mechanisms for HIV reservoir persistence and their genetic signatures.** Viral  
120 replication despite ART would lead to accrual of new mutations (color change) and novel chromosomal  
121 integration sites in newly infected cells. Alternatively, longevity of latently infected cells maintains  
122 sequences and integration sites. Finally, cellular proliferation of latently infected cells produces clonal  
123 populations of equivalent HIV sequences and integration sites.

124  
125 Throughout the paper, we contrast the impact of HIV replication and cellular proliferation on HIV  
126 persistence during ART by quantifying the numbers or fractions of *unique* sequences and *equivalent*  
127 sequences. Human DNA polymerase has much higher copying fidelity than HIV's reverse transcriptase.  
128 Thus, we assume cells whose origin is viral replication will contain unique sequences while cells whose  
129 origin is cellular proliferation will contain equivalent sequences and be members of clonal populations.

130  
131 **Fractions of equivalent total HIV DNA sequences may be extrapolated to replication competent**  
132 **sequences.** Most integrated HIV DNA has accrued mutations that render the virus replication  
133 incompetent. Quantification of total HIV DNA copies therefore overestimates the size of the replication  
134 competent reservoir by 2-3 orders of magnitude relative to viral outgrowth assays.<sup>32</sup> Replication  
135 incompetent, equivalent HIV sequences are commonly present in multiple cells<sup>24,29</sup>. Precisely because  
136 these sequences are terminally mutated, they are concrete evidence that some other mechanism  
137 (cellular proliferation) copies HIV DNA. The proportion of clonal sequences is similar when analysis  
138 includes only replication competent sequences, or all HIV DNA.<sup>34</sup> As a result, while total HIV DNA may  
139 not predict quantity of replication competent viruses, estimates of clonal frequency using total HIV DNA

140 might be extrapolated to the smaller replication competent reservoir.<sup>33</sup> We use total HIV DNA as it  
 141 allows a greater sample size for analysis.

142  
 143 **Clonal HIV DNA sequences and clonal replication competent sequences are detectable at various time**  
 144 **points during ART.** To examine the structure of clonal total and replication competent HIV DNA, we  
 145 ranked observed sequences from several studies according to their abundance: rank-abundance curves  
 146 are ordered histograms denoted  $a(r)$  such that  $a(1)$  is the abundance of the largest clone. These curves  
 147 facilitate identification of quantities of interest like the richness  $R = \max(r)$ , sample size  $N = \sum_r a(r)$ ,  
 148 and the number of singletons  $N_1 = \sum_r I[a(r) = 1]$ . Here  $I[\cdot]$  is the indicator function equal to 1 when  
 149 its argument is true and 0 otherwise.

150

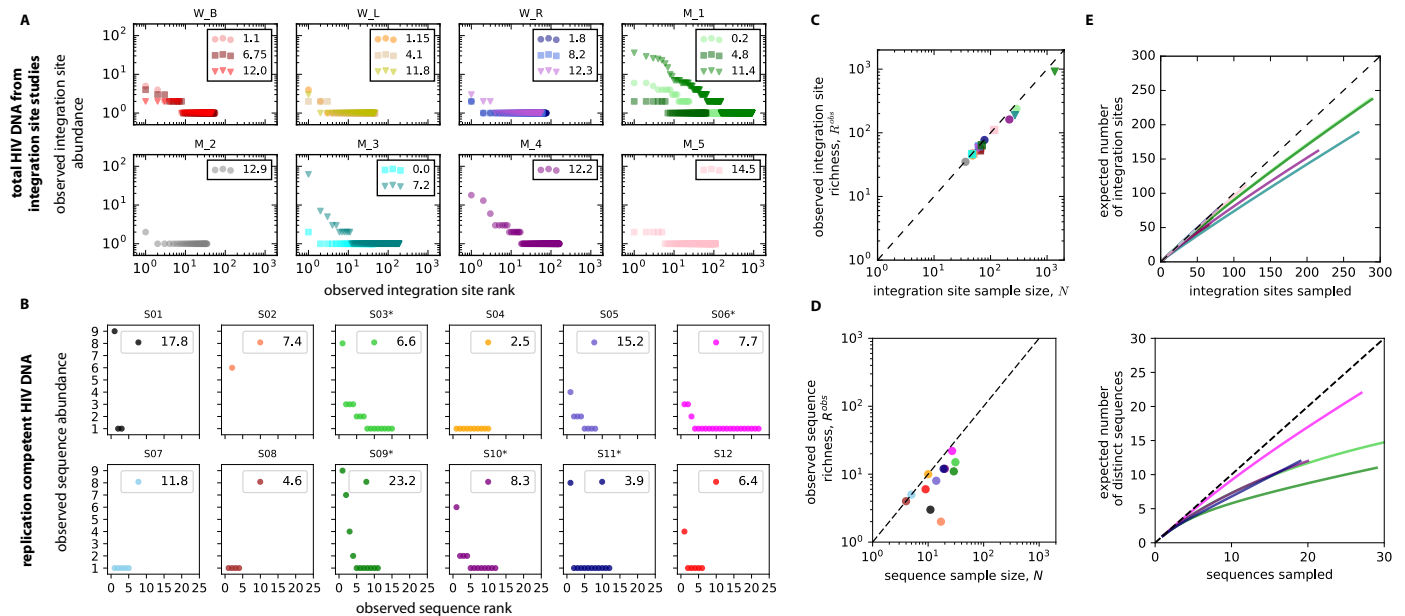

151  
 152 **Figure 2. Evidence for clonal HIV sequences.** Raw data rearranged as rank abundance curves. **A.** Total  
 153 HIV DNA from integration site data (Wagner et al., and Maldarelli et al.)<sup>36,37</sup>. Each panel represents a  
 154 participant, and each marker a duration of ART (indicated in years in the panel legend). W and M in the  
 155 panel headings distinguish the study. **B.** Replication competent HIV DNA (Hosmane et al.)<sup>34</sup>. Each panel  
 156 represents a participant. Participants used for analyses below have more than 20 sequences observed  
 157 (noted by asterisks in panel headings). **C & D.** Sample size of HIV DNA (**C**) and replication competent HIV  
 158 DNA (**D**). Measuring total HIV DNA increases the number of observed unique sequences (observed  
 159 sequence richness). The number of total sequences at each time point is plotted against the observed  
 160 sequence richness. For all HIV DNA samples and when  $N > 20$  for replication competent HIV DNA, the  
 161 observed richness is always less than the sample size (to the right of the dotted line  $y=x$ ), owing to the  
 162 presence of sequence clones. **E.** Sample rarefaction curves for all 17 time points from the 8 study  
 163 participants in **A** demonstrate the observed number of distinct integration sites as a function of HIV DNA  
 164 sequence experimental sample size. **F.** Sample rarefaction curves for all 5 study participants in **B**  
 165 demonstrate the observed number of distinct replication competent HIV DNA sequences as a function of  
 166 sequence sample size. In both cases, at low sample size, distinct sequences are commonly observed with  
 167 each new sample. As sample size increases, distinct sequences are increasingly less likely to be detected  
 168 owing to the presence of repeatedly detected sequence clones. As more and more unique sequences are  
 169 detected, the curves would flatten until all unique sequences are detected and the curve is completely  
 170 flat.

171  
172 Wagner *et al.* sampled HIV DNA in three participants at three time points 1.1-12.3 years following ART  
173 initiation.<sup>37</sup> Maldarelli *et al.* sampled HIV DNA from five participants at one to three time points 0.2-14.5  
174 years following ART initiation.<sup>36</sup> In these studies, 1-16% (mean: 7%) of sequences were members of  
175 *observed sequence clones* (**Fig 2A**),<sup>36,37</sup> meaning that HIV DNA was identified in the same chromosomal  
176 integration site in at least two cells. The absolute number of observed sequence clones  $N_{i>1}$  in the 17  
177 samples ranged from 1-150 (mean: 15). The remaining sequences were identified in a specific  
178 chromosomal integration site in only one cell (*observed singletons*).<sup>37</sup> For total HIV DNA, at each  
179 participant time point, certain sequences predominated: the largest observed sequence clone contained  
180 2-62 sequences (mean: 11), accounting for 3-26% (mean= 9%) of total observed sequences.

181  
182 Hosmane *et al.* sequenced replication competent HIV isolates from 12 study participants on ART: 0-28%  
183 (mean: 11%) of sequences were members of *observed sequence clones* (**Fig 2B**).<sup>34</sup> The lack of detected  
184 clones in 3 participants may reflect their low sequence sample size. Participants with fewer than 20  
185 total sequences were therefore excluded from individual analyses described below but were included  
186 for population level evaluations. For replication competent HIV DNA in the 5 persons having sequence  
187 sample-size  $N > 20$ , certain sequences dominated: the largest observed sequence clone contained 3-9  
188 sequences (mean: 6.8), accounting for 11-42% (mean= 28%) of total observed sequences. The number  
189 of non-singleton sequence clones  $N_{i>1}$  in the 5 samples ranged from 1-7 (mean: 3.8).

190  
191 **Sequence sampling depth is low relative to total population size.** There was a higher number of  
192 experimentally detected sequences ( $N$ ) for total HIV DNA (**Fig 2C**) than for replication competent HIV  
193 (**Fig 2D**). For total HIV DNA, the number of observed *unique* sequences ( $R^{obs}$  or the *observed sequence*  
194 *richness*) was always less than  $N$  (**Fig 2C**) due to clonal populations. Where  $N > 20$  for replication  
195 competent viruses,  $R^{obs}$  was always less than  $N$ , again due to the presence of clones (**Fig 2D**). There was  
196 a higher  $R^{obs}$  as the sequence sample size increased (**Fig 2C&D**), suggesting that detection of unique  
197 clones increases with deeper sampling.

198  
199 Thus, we can infer that further sampling would likely uncover new unique sequences. To quantify the  
200 relationship between sample size and discovery, we generated sample rarefaction curves (see **Methods**  
201 and **Supplementary Methods**) using the rank-abundance distributions (**Fig 2E&F**). These curves  
202 interpolate the data to demonstrate the likely discovery of new sequences as sampling increases up to  
203 the sample size of the original experiment. At low sample size, a new sequence is likely to be found with  
204 each additional sample. As sampling increases, the chance of sampling a previously documented  
205 sequence increases, and the slope of the rarefaction curve begins to flatten. As sample size approaches  
206 the true richness of the population, the curve plateaus and few new unique sequences remain to be  
207 sampled. Current sampling depth remains on the steep, initial portion of the curve.

208  
209 **Ecological estimates of lower bounds on true HIV sequence richness from limited samples.** To estimate  
210 a lower bound for true sequence richness, we used the Chao1 estimator, a nonparametric ecologic tool  
211 that uses frequency ratios of observed singletons  $N_1$  and doubletons  $N_2$  (see **Methods** and  
212 **Supplementary Methods**).<sup>45,46</sup> For the HIV reservoir, theoretical values for true richness range from one  
213 (if all sequences were identical and originated from a single proliferative cell) to the total population size  
214 (if all sequences were distinct and originated from error-prone viral replication). We found estimated  
215 lower bounds for true sequence richness exceeded observed richness, typically by an order of  
216 magnitude in both total HIV DNA and replication competent HIV (**Fig 3**). These initial lower bound  
217 estimates for sequence richness are far lower than previously estimated population sizes for HIV DNA  
218 and replication competent HIV DNA sequences,<sup>2,3,6</sup> suggesting that clones may predominate.



219  
220

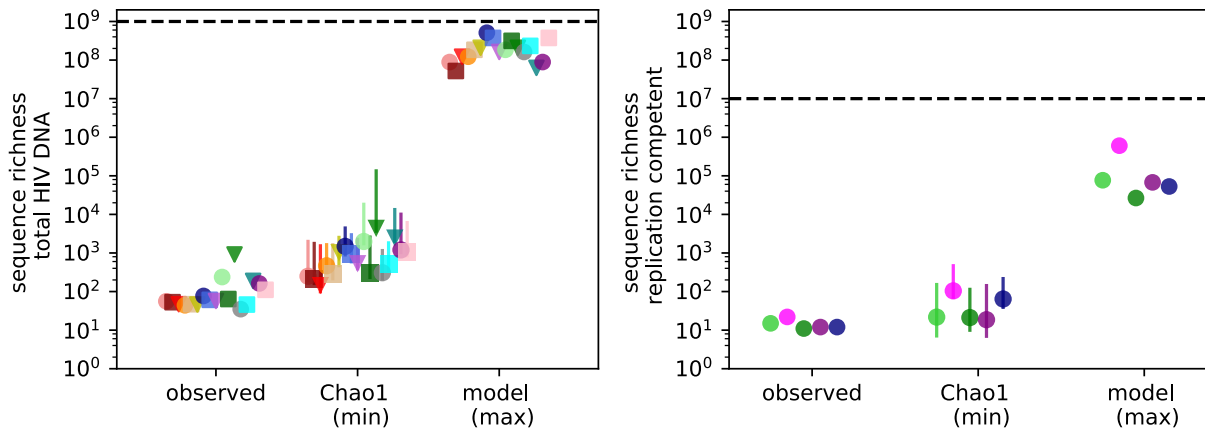

221  
222 **Figure 3. The actual total number of distinct HIV sequences far exceeds the observed total number of**  
223 **distinct HIV sequences during ART.** Observed sequence richness underestimates the true HIV sequence  
224 richness. For both data sources, Chao1 provides an estimate of the lower bound (min) of true sequence  
225 richness (error bars are asymmetric confidence intervals, see **Supplementary Methods**). In all cases,  
226 Chao1 estimates are above observed values. Our modeling technique estimates a much higher upper  
227 bound (max) for true sequence richness. Nevertheless, the total HIV sequence population size (dashed  
228 lines:  $10^9$  for total HIV DNA and  $10^7$  for replication competent HIV) is 1-2 orders of magnitude above the  
229 upper bound estimates for sequence richness, suggesting substantial clonality of HIV sequences.

230  
231 **A majority of observed HIV sequences are members of large proliferative clones.** The Chao1 estimator  
232 does not include information about the total population size. However, estimates for the total number  
233 of total DNA and replication competent sequences in the entire reservoir exist.<sup>33</sup> Using that additional  
234 information, we developed an ecologic model to extrapolate the true rank-abundance of HIV sequences  
235 for each participant time point.

236  
237 Based on the observation that observed data was roughly log-log-linear (**Figure 2A**), we chose a power-  
238 law model for rank-abundance:  $a(r) \propto r^{-\alpha}$ . Other functional forms were explored (exponential, linear,  
239 and biphasic power law) but were worse or equivalent for data fitting (not shown). Our model requires 3  
240 parameters, the power law exponent ( $\alpha$ ), the sequence population size ( $L$ ), and the sequence richness  
241 ( $R$ ). Model fitting is described in the **Methods** with additional detail in the **Supplementary Methods**.  
242 Briefly, we generated 2,500 possible models for each data set, choosing a plausible fixed population size  
243 from available data ( $L = 10^9$  for HIV DNA and  $L = 10^7$  for intact, replication competent HIV  
244 DNA).<sup>2,3,6,33,47</sup> We then recapitulated the experiment by taking  $N$  random samples from each model  
245 distribution and comparing sampled data to experimental data to find optimal model parameters. This  
246 resampling method correctly inferred the power law exponent from simulated power law data  
247 (**Supplementary Fig 1**).

248  
249 However, for experimental data we could not precisely identify  $R$ . Recognizing this uncertainty, we  
250 developed an integral approximation to estimate the largest possible richness (least clonality) given  $L$   
251 and the best-fit  $\alpha$  (derivation in **Supplementary Methods** and illustration in **Supplementary Fig 2**). Then,  
252 using the lower bound estimate from the Chao1 estimator, we were able to fully constrain the estimate  
253 of true HIV sequence richness in the reservoir. Our maximal estimates for sequence richness were

254 notably several orders of magnitudes higher than Chao1 estimates (**Fig 3**) but lower than the total  
255 sequence population size ( $L$ ).

256

257 Our method demonstrated excellent fit to cumulative proportional abundances of observed clones for  
258 total HIV DNA (**Fig 4A**) and replication competent HIV DNA (**Fig 5A**). For total HIV DNA (**Fig 4B**) and  
259 replication competent HIV DNA (**Fig 5B**), optimal fit was noted within narrow ranges for the power law  
260 slope parameter but across a wide possible range of true sequence richness. Using the top 5 best fit  
261 models, we generated extrapolated distributions of the entire HIV sequence rank-abundance for each  
262 participant time point. We observed similar estimates for the population size of the largest clones,  
263 which account for approximately 50% of the reservoir (200-2,000 clones for HIV DNA in **Fig 4C** and 2-7  
264 clones for replication competent HIV DNA in **Fig 5C**). However, the tail of the reservoir, which consists of  
265 thousands of smaller clones, varied considerably across the parameter sets with 900-100,000 possible  
266 clones accounting for 90% of the HIV DNA and 100-2,000 possible clones accounting for 90% of  
267 replication competent HIV. This variability reflects the fact that true sequence richness is only partially  
268 identifiable using our procedure.

269



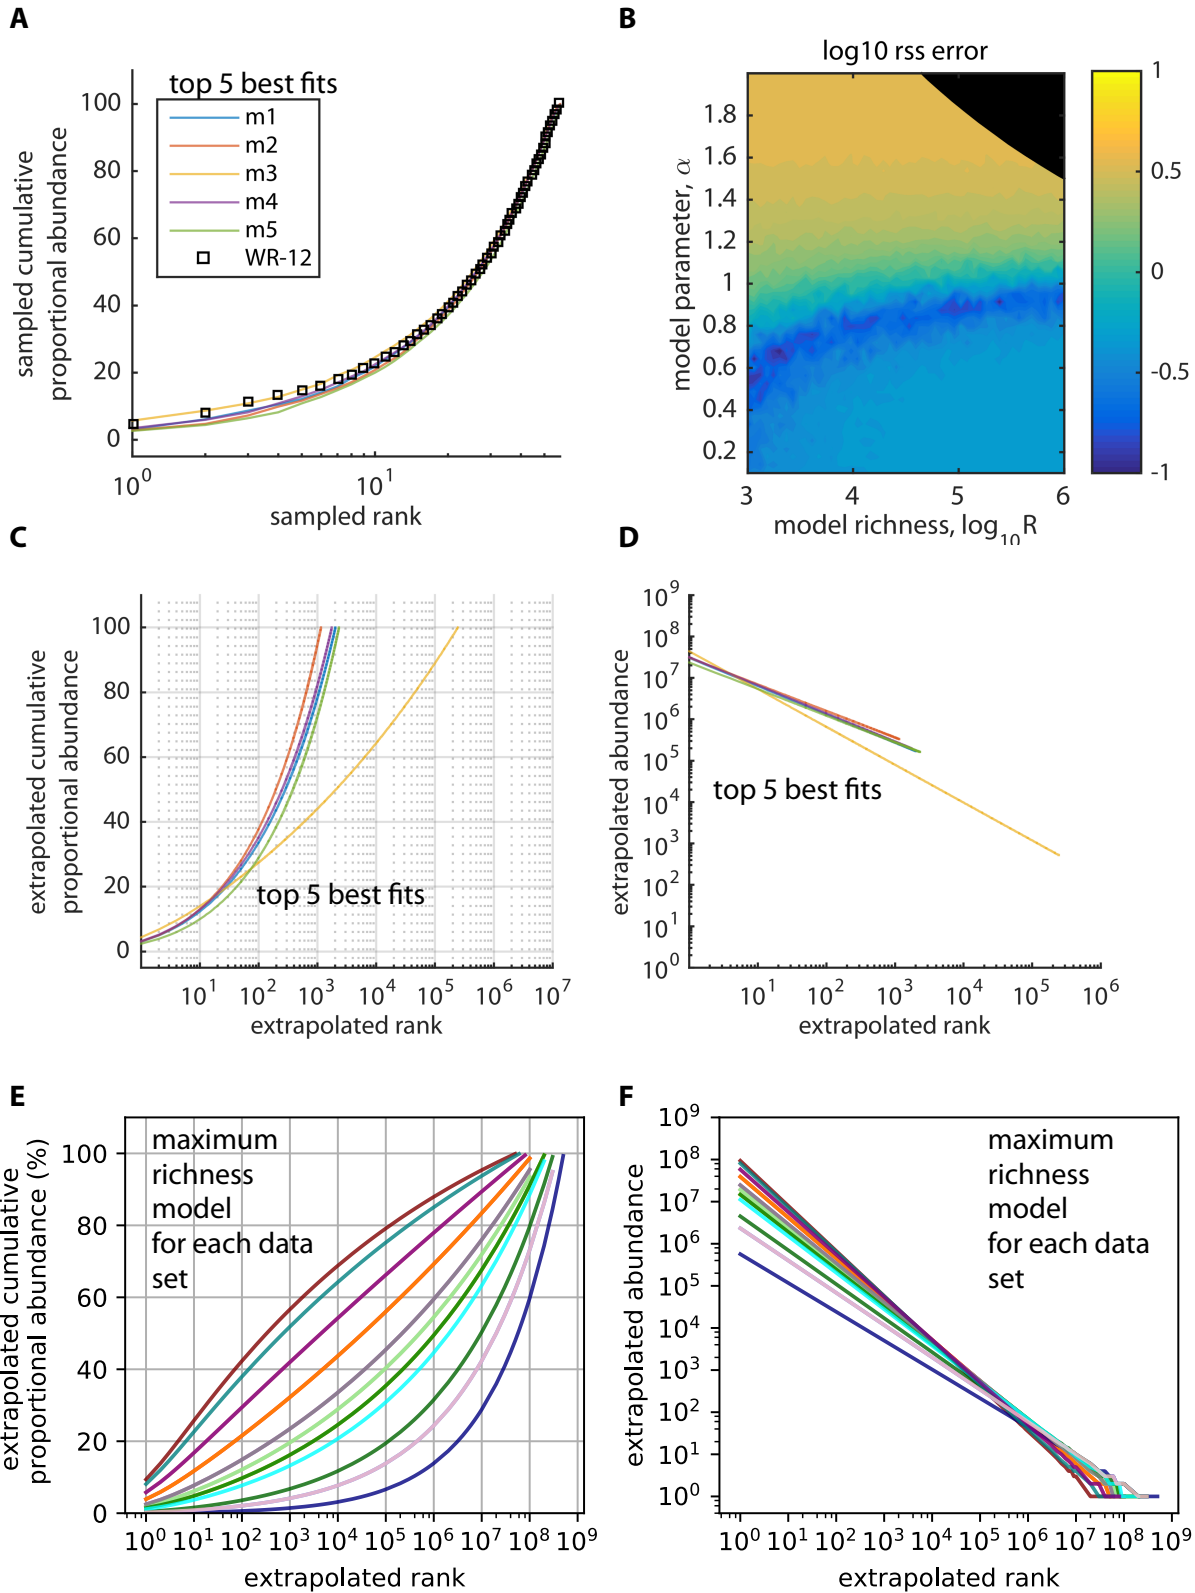

270  
271  
272

**Figure 4. Ecologic modeling suggests a majority of HIV DNA sequences are members of sequence clones.** To model the true rank abundance distribution of the HIV reservoir, we used a power law model

273 *and recapitulated experimental sampling (sample size equal to the experimental sample size) from 2,500*  
274 *theoretical power law distributions to fit the best model to participant data in Fig 2A. Theoretical*  
275 *distributions varied according to the slope of the power law and the true sequence richness but were*  
276 *fixed at  $10^9$  total HIV DNA sequences. A. Five best model fits to cumulative proportional abundance*  
277 *curves from a single representative participant (WR, 12 years on ART). Black circles represent the*  
278 *experimental data; the 5 colored model lines are superimposed based on virtually equivalent fit to the*  
279 *data. B. Heat diagram representing model fit according to power law exponent  $\alpha$  and true sequence*  
280 *richness  $R$  with best fit noted by minimum error score (blue color, see details of calculation in results*  
281 *above); black shaded areas represent parameter sets excluded based on the Chao1 estimator (lower*  
282 *bound on sequence richness) and mathematical constraints of the power law (upper bound for sequence*  
283 *richness). A wide range of values for sequence richness allow excellent model fit while the power law*  
284 *exponent is well defined. C. Extrapolations of the best-fit cumulative distribution function to the entire*  
285 *pool of  $10^9$  infected cells; under the most conservative estimates, the top 200,000 ranked clones*  
286 *constitute the entire reservoir. D. Extrapolations of the best fit power law to the entire pool of  $10^9$*   
287 *infected cells; the top 1000 clones consist of  $>10^4$  cells each. E. Extrapolations of the best fit cumulative*  
288 *distribution function to the entire pool of  $10^9$  infected cells for all participant time points in Fig 2A; we*  
289 *assume the maximum possible sequence richness in each case and still note a predominance of sequence*  
290 *clones. F. Extrapolations of the best-fit power law to the entire pool of  $10^9$  infected cell for all*  
291 *participants in Fig 2A; the top 1,000 clones each consist of  $>10^4$  cells each. A large number of clones*  
292 *( $\sim 10^6$ ) contain many fewer cells ( $<100$ ).*

293  
294 Even under the most conservative assumptions (maximum possible true sequence richness in Fig 3), the  
295 vast majority of sequences were predicted to be members of true sequence clones. For the participant  
296 in Fig 4C, a maximum of 200,000 clones were needed to reach 100% cumulative abundance for HIV DNA.  
297 The ratio of estimated true sequence richness to the total number of infected cells  $R/L$  with HIV DNA  
298 ( $\sim 10^5:10^9$ ) represents an upper limit on the fraction of sequences that are true singletons: we estimate  
299 that greater than 99.9% of infected cells contain true clonal sequences (Fig 3).

300  
301 Similarly, the ratio of estimated true sequence richness to the total number of infected cells with  
302 replication competent HIV for the participant in Fig 5C was  $10^5:10^7$ . Hence, at least 99% of cells contain  
303 true clonal sequences (Fig 3). Of note, this ratio is stable regardless of assumed reservoir size. For  
304 instance, if we assume a true reservoir size of  $10^6$ , then our estimate of true sequence richness is  $\sim 10^4$ .

305  
306 The model fitting procedure was used on all data in Fig 2. We biased against a clonally dominated  
307 reservoir to the greatest extent possible by selecting the best fitting power law exponent and then  
308 calculating the maximum possible sequence richness (Fig 3). The power law slope parameter was on  
309 average lower across participants for HIV DNA ( $\alpha = 0.9 \pm 0.1$ ) than for replication competent HIV DNA  
310 ( $\alpha = 1.4 \pm 0.2$ ). As a result, the predicted cumulative distribution of HIV DNA (Fig 4E) was often  
311 concave-up with log rank as compared to concave-down with log rank noted for replication competent  
312 HIV DNA (Fig 5E), suggesting that a smaller number of extremely large clones might make up a higher  
313 proportion of the replication competent HIV reservoir.

314  
315 For both HIV DNA (Fig 4F) and replication competent virus (Fig 5F), the top 100 clones in all participants  
316 are estimated to be massive ( $>10^5$  and  $>10^4$  cells respectively). However, there are also large numbers of  
317 much smaller clones with fewer than 1,000 cells ( $>10^6$  and  $>10^4$  clones respectively). In contrast to  
318 observed data, a majority of sequences are clonal, suggesting that proliferation is the major generative  
319 mechanism of persistent HIV-infected cells.

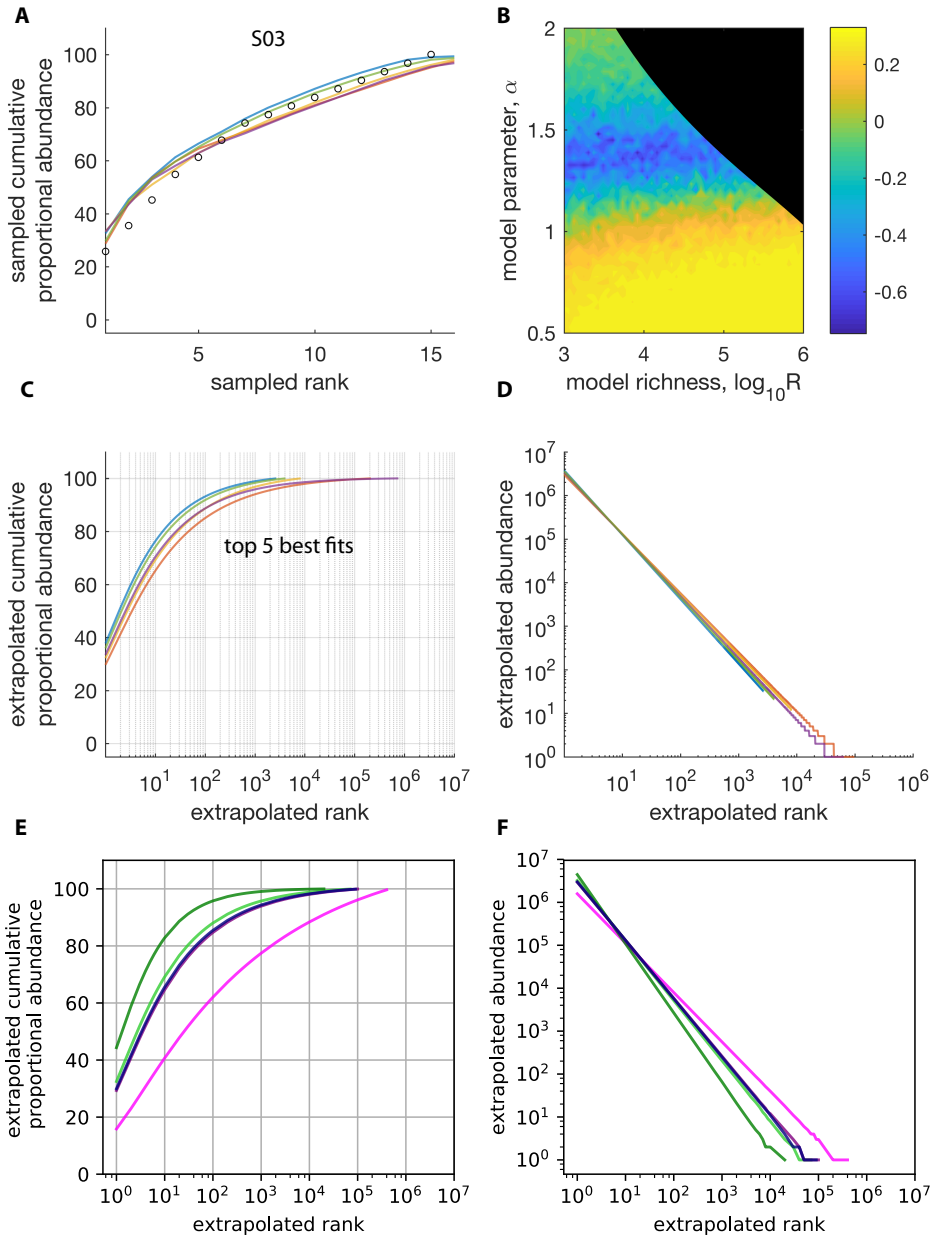

320  
321 **Figure 5. Ecologic modeling suggests a majority of replication competent HIV sequences are members**  
322 **of sequence clones.** To recapitulate experimental conditions in Fig 2B, we performed in silico sampling  
323 (sample size equal to the experimental sample size) from 2,500 theoretical power law distributions of  
324 replication competent HIV clone size distributions sorted by rank. Theoretical distributions varied  
325 according to the exponent of the power law model and the true sequence richness and were fixed at a  
326 reservoir size of  $10^7$  replication competent HIV DNA sequences. **A.** Five best model fits to cumulative  
327 proportional abundance curves from a single representative participant (S10). Black circles represent the  
328 experimental data; the 5 colored model lines are from five separate parameter sets. **B.** Heat map  
329 representing model fit according to power law slope  $\alpha$  and true sequence richness  $R$  with best fit noted  
330 by lowest error (blue color); the black shaded area represents parameter sets excluded based on  
331 mathematical constraints of the power law (upper bound on sequence richness). A wide range of values  
332 for sequence richness ( $<10^5$  sequences) allow excellent model fit while power law slope falls within a  
333 narrow range. **C.** Extrapolations of the best-fit cumulative distribution function to the entire pool of  $10^7$

334 *infected cells; under the most conservative estimates, the top  $10^5$  ranked clones constitute the entire*  
335 *reservoir. D. Extrapolations of the best fit power law to the entire pool of  $10^7$  infected cells; the top 100*  
336 *clones consist of  $>10^4$  cells each. E. Extrapolations of the best fit cumulative distribution function to the*  
337 *entire pool of  $10^7$  infected cells for all participants and time points (see original data in Fig 2B); we*  
338 *assume the largest possible observed sequence richness in each case and still note a predominance of*  
339 *sequence clones. F. Extrapolations of the best-fit power law to the entire pool of  $10^7$  infected cell for all*  
340 *participants in Fig 2B; the top 100 clones again consist of  $>10^4$  cells each. A large number of clones*  
341 *( $\sim 10^4$ ) contain many fewer cells ( $<100$ ).*

342

343 **Modeling combined population data gives similar results as individual fitting.** To increase sample size  
344 and eliminate bias related to excluding participants with low sample sizes, we combined results from all  
345 participant time points for HIV DNA (17 time points) and replication competent HIV (12 time points) into  
346 single rank order distribution curves. We then fit the power law models to both sets of data  
347 (Supplementary Fig 3A&B, E&F). We again noted a narrow range of possible values for the power law  
348 exponent and a large range of possible values for true sequence richness. The exponent was again  $\alpha <$   
349  $1$  for total HIV DNA and  $\alpha \approx 1$  for replication competent virus (Supplementary Fig 3A&E), leading to  
350 concave-up and linear relationships between cumulative proportional abundance and log rank,  
351 respectively (Supplementary Fig 3C&G). We estimated that at least 99.9% of cells with HIV DNA  
352 (Supplementary Fig 3C) and 99.8% of cells with replication competent HIV (Supplementary Fig 3G)  
353 contain true clonal sequences. The top 100 HIV DNA clones (Supplementary Fig 3D) and replication  
354 competent clones (Supplementary Fig 3H) contained  $>10^6$  and  $>10^4$  cells respectively.

355

356 Using the population level data, we generated sample rarefaction curves from the extrapolated rank-  
357 abundance curves. These curves show that after 10,000 sequences were sampled, the observed  
358 sequence richness would continue to increase with more sampling (Supplementary Fig 4). Even if  
359 experimental sample sizes could be increased 100-fold from the present data, sequences would  
360 continue to be dominated by those from large clones. Our statistical inference approach is therefore  
361 necessary to provide a more realistic estimate of the clonal distribution of the HIV reservoir.

362

363 **A mechanistic model that includes both an ART sanctuary and cellular proliferation can reconcile**  
364 **observations from early and late ART.** Our analyses above identify the critical role of cellular  
365 proliferation in generating infected cells after a year of ART but do not capture the dynamic mechanisms  
366 underlying this observation or explain possible evidence of viral evolution during months 0-6 of ART.<sup>4</sup>  
367 We therefore developed a viral dynamic mathematical model. Our model (Fig 6A) consists of differential  
368 equations, described in detail in the **Methods**. Most model parameter values are obtained from the  
369 literature (Table 1).

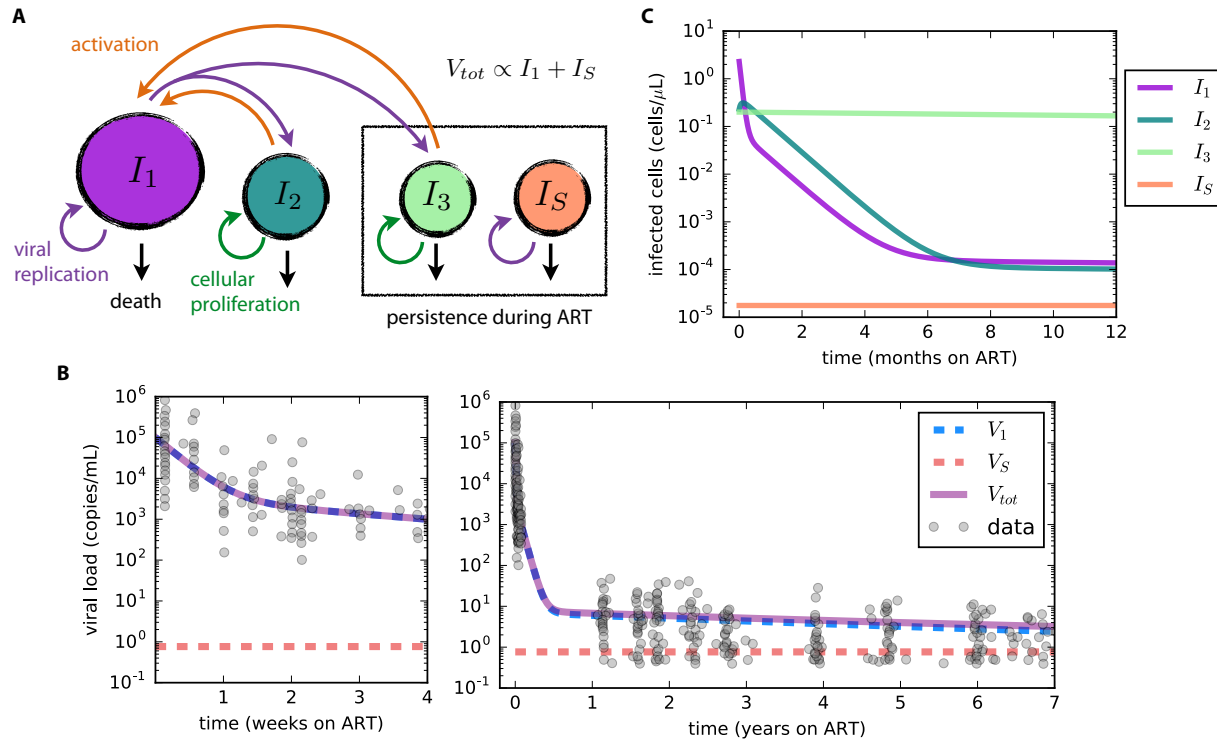

370  
 371 **Figure 6. A mechanistic model recapitulates HIV RNA decay and predicts rough equivalence of virus**  
 372 **produced by the sanctuary and virus produced by a reactivating reservoir up until months 4-6 of ART.**  
 373 **A.** Model schematic:  $I_1$  cells produce virus, pre-integration latent cells  $I_2$  are longer lived and eventually  
 374 transition to  $I_1$ , and long-lived latently infected cells  $I_{3(j)}$  proliferate and die at measured rates  
 375 depending on cell phenotype  $j$  (e.g. effector memory, central memory, naïve). Sanctuary cells  $I_S$  allow  
 376 ongoing HIV replication despite ART. Parameters and their values are discussed in the Methods and listed  
 377 in Sup Table 1. **B.** The mathematical model recapitulates observed HIV RNA data (Palmer et al.<sup>51</sup>) over  
 378 weeks and years of ART.  $V_1$  is virus derived from  $I_1$  while  $V_S$  is derived from  $I_S$ . **C.**  $I_2$  and  $I_3$  become the  
 379 predominant cell types early during ART.  $I_S$  remains very low throughout the duration of ART which is  
 380 necessary to explain the lack of detectable viremia on fully suppressive ART.

381  
 382 Briefly, we classify rapid death  $\delta_1$  and viral production within actively infected cells  $I_1$ . Cells with longer  
 383 half-life  $I_2$  are activated to  $I_1$  at rate  $\xi_2$ .  $I_2$  may represent CD4+ T cells with a prolonged pre-integration  
 384 phase, but their precise biology does not affect model outcomes.<sup>48</sup> The state  $I_{3(j)}$  represents latently  
 385 infected reservoir cells of phenotype  $j$ , which contain a single chromosomally integrated HIV DNA  
 386 provirus.<sup>44</sup>  $I_3$  reactivates to  $I_1$  at rate  $\xi_3$ .<sup>49</sup> The probabilities of a newly infected cell entering  
 387  $I_1, I_2, I_{3(j)}$ , are  $\tau_1, \tau_2, \tau_{3(j)}$ . Because we are focused on the role of proliferation, we assume sub-  
 388 populations of  $I_3$ ,<sup>12</sup> including effector memory ( $T_{em}$ ), central memory ( $T_{cm}$ ), and naïve ( $T_n$ ) CD4+ T cells,  
 389 which have been experimentally proven to turn over at different rates  $\alpha_{3(j)}, \delta_{3(j)}$ .<sup>12,42,43</sup>

390  
 391 ART potency  $\epsilon \in [0,1]$  characterizes decrease in viral infectivity due to ART.<sup>50</sup> Other dynamic features of  
 392 infection such as death rate of infected cells, latent cell proliferation rate and reactivation rates of latent  
 393 cells, are unchanged on ART. In our simulations, the basic reproductive number becomes  $R_0(1 - \epsilon)$  on  
 394 ART and is  $<1$  when  $\epsilon > 0.95$ , meaning that each cell infects fewer than one other cell and viral load  
 395 declines from its previous steady state until becoming undetectable. Only short stochastic chains of new  
 396 infection can occur.



397

398 To make a model inclusive of viral evolution despite ART, we allow for the possibility of a drug sanctuary  
399 state ( $I_S$ ) that reproduces with reproductive number  $R_0(1 - \epsilon_S) \sim 8$ . In the drug sanctuary, ART potency  
400 is assumed to be negligible ( $\epsilon_S = 0$ ) such that the sanctuary reproductive number is equivalent to the  
401 value from a model without ART. Target cell limitation or a local immune response must result in a  
402 sanctuary viral set point to prevent infected cells and viral load from growing exponentially. The  
403 sanctuary size must also be limited (0.001-0.01% of the original burden of replicating HIV) to achieve  
404 realistic viral decay kinetics.<sup>51</sup> In the absence of contradictory information, we assumed homogeneous  
405 mixing of  $V_1$  and  $V_S$  in blood and lymph nodes.<sup>4</sup>

406

407 Based on the observation that activated, uninfected CD4+ T cells ( $S$ ), the targets for replicating HIV,  
408 decrease in numbers after initiation of ART we also simulate the model with and without the possibility  
409 of slow target cell decline within the HIV drug sanctuary. We approximate this process with an  
410 exponential decay of target cells with rate  $\zeta$  (per day).<sup>52,53</sup> The decay rate is lower than concurrent decay  
411 rates measured from HIV RNA<sup>50,51,54</sup> because abnormal T cell activation persists for more than a year  
412 after ART.<sup>53</sup>

413

414 **The model accurately simulates viral dynamics during ART.** We fit the model to ultra-sensitive viral load  
415 measurements collected from multiple participants in Palmer *et al.*<sup>51</sup> We included experimentally  
416 derived values for most parameter values (**Table 1**), solving only for activation rates  $\xi_2$  and  $\xi_3$  by fitting  
417 to viral load. Simulations reproduce three phases of viral clearance (**Fig 6B**) and predict trajectories of  
418 infected cell compartments (**Fig 6C**). Of note, the model is able to achieve fit to the data with different  
419 assumptions of starting values of the three infected cell compartments (the relative proportion of which  
420 are unknown pre-ART): in this circumstance, we arrive at different values of  $\xi_2$  and  $\xi_3$  without impacting  
421 overall model conclusions regarding the HIV reservoir. The size of the sanctuary (expressed as the  
422 fraction of infected cells  $\phi_S$ ) is only constrained to be below a value  $<10^{-5}$  to ensure accurate model fit  
423 for a static sanctuary model.

424

425 **Cellular proliferation sustains HIV infection during ART whether or not a small drug sanctuary exists.**  
426 We next used the model to estimate the fraction of cells generated by cellular proliferation versus viral  
427 replication. We conservatively assumed that prior to ART all infected cells were generated by viral  
428 replication. Then, we tracked the number of cells whose origin was replication and the number whose  
429 origin was cellular proliferation. Without directly simulating a phylogeny, the fraction of all cells that  
430 derive from replication provides a surrogate for the expected fraction of cells that would give a signal of  
431 evolution. We also distinguish the *current replication percentage*, the fraction of infected cells currently  
432 being generated from viral replication, from the *net replication percentage*, the fraction of total infected  
433 CD4+ T cells at a given time whose origin was HIV replication. This distinction allows us to contrast the  
434 net number of surviving, historically-infected cells with the number of cells that are presently being  
435 generated via HIV infection. Because many long-lived cells were once generated by HIV infection, the  
436 net replication percentage may exceed the current replication percentage.

437

438 We then simulated the model under several plausible sanctuary and reservoir conditions to assess the  
439 relative contributions of infection and cellular proliferation in sustaining infected cells. We considered  
440 different reservoir compositions based on evidence that effector memory ( $T_{em}$ ), central memory ( $T_{cm}$ )  
441 and naïve ( $T_n$ ) cells proliferate at different rates and that distributions of infection in these cells differ  
442 among infected patients.<sup>12,42,43</sup> Further, because a drug sanctuary has not been observed, its true  
443 volume is unknown and may vary across persons. We therefore conducted simulations with a static  
444 sanctuary, a slowly diminishing sanctuary, and no drug sanctuary (**Fig 7A**).



445

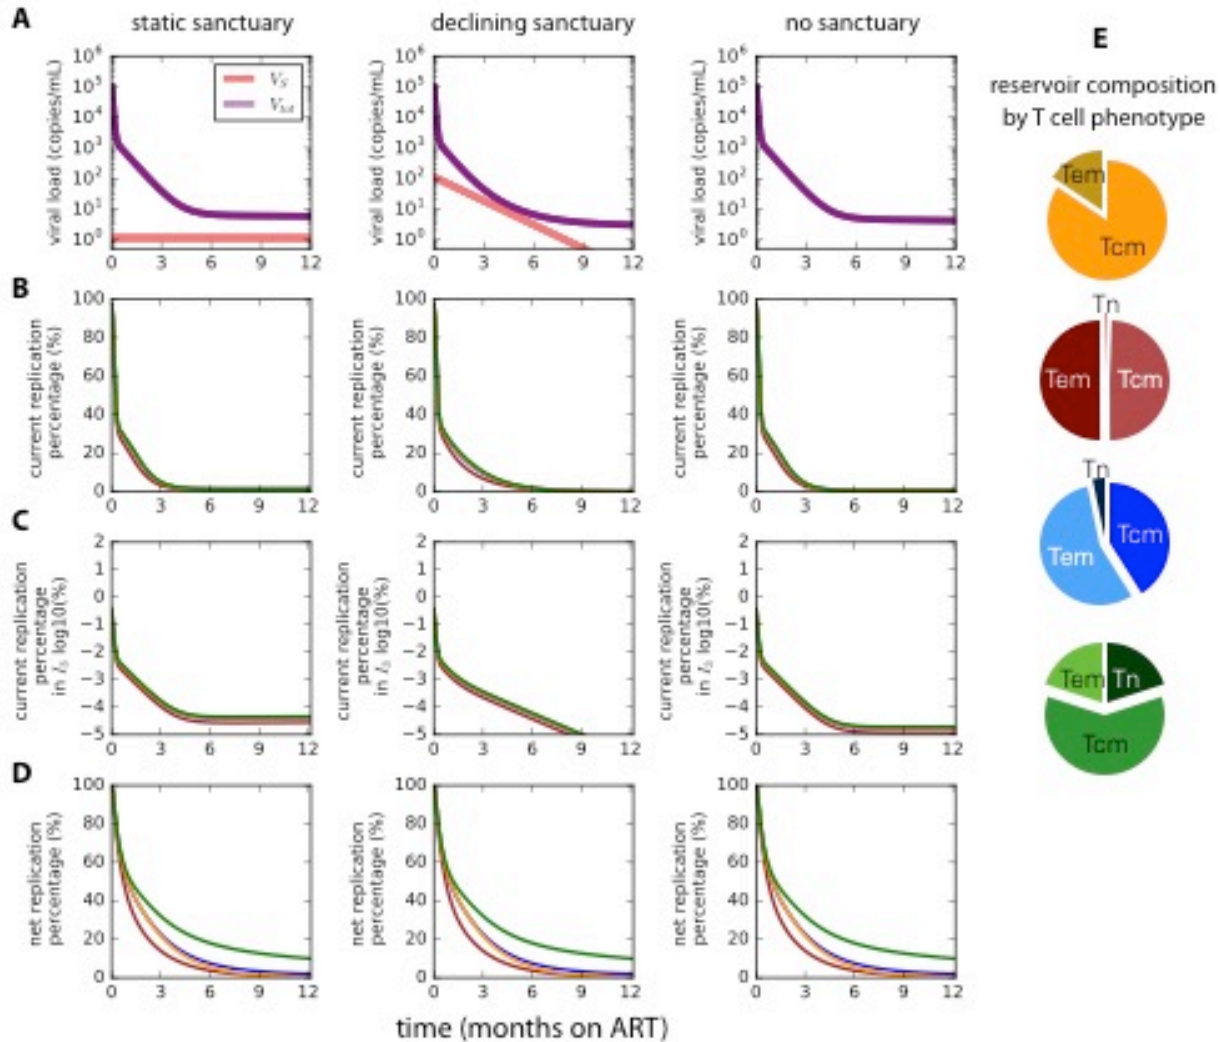

446

447

448

449

450

451

452

453

454

455

456

457

458

459

460

461

462

**Figure 7. The vast majority of infected cells are generated via proliferation within 6 months of ART initiation.** Model simulations contrast the number of cells generated by viral replication with those generated by cellular proliferation. The fraction of cells generated by replication at any time point is referred to as the current replication percentage. The fraction of cells that remain alive whose ultimate origin was viral replication is referred to as the net replication percentage. Different assumptions regarding sanctuary ( $I_S$ ) and latent cell populations ( $I_3$ ) were simulated corresponding to columns. **A.** Moving left to right, we assume a static drug sanctuary, a slowly declining drug sanctuary and no drug sanctuary. Pie charts on the right indicate the reservoir composition by T cell phenotypes and correspond with colored lines in **B-D**. **B.** Under all assumptions, once ART is initiated, most new infected cells arise due to cellular proliferation as opposed to HIV replication after 12 months of ART. **C.** New latently infected reservoir cells ( $I_3$ ) are generated almost entirely by proliferation soon after ART is initiated under all conditions. **D.** The observed proportion of infected cells originally generated by HIV infection rather than cellular proliferation will overestimate the actual ongoing proportion during the first 6 months of ART assuming a small or large sanctuary volume. This trend is more notable when the reservoir contains a higher proportion of slowly proliferating naïve T cells.

463 Regardless of assumed pre-treatment reservoir composition and sanctuary size, the contribution of  
464 replication to generation of new infected cells is negligible after one year of ART. The contribution of  
465 new replication diminishes rapidly with time on ART regardless of whether a sanctuary is assumed (**Fig**  
466 **7B**). The fraction of long lived latently infected cells ( $I_3$ ) generated by viral replication (**Fig 7C**, note log  
467 scale) is negligible within days of ART initiation. This finding captures the extent of the impact of  
468 proliferation even when a sanctuary is assumed.

469  
470 **Observable HIV DNA sequence evolution during early ART can represent a fossil record of prior**  
471 **replication events.** In all simulations, the net fraction of cells generated from viral replication rather  
472 than cellular proliferation at 6 months of ART (5-25% in **Fig 7D**) is higher than the current percentage  
473 generated by replication (**Fig 7B**). A higher fraction of slowly proliferating  $T_n$  cells exacerbates the  
474 difference between historical and contemporaneous generation of infected cells (**Fig 7D**, green line).  
475 Because the net fraction is what will be observed experimentally, the model reveals why ongoing  
476 evolution might be observed even while the dominant mechanism sustaining the reservoir is cellular  
477 proliferation. In keeping with the first section of our paper, after 12 months of ART, the net and current  
478 percentage of infected cells generated by HIV replication become negligible for all simulated parameter  
479 sets. Importantly, the lag between net and current viral replication generation emerges whether or not  
480 a small drug sanctuary is included in the model.

481  
482 We refer to the phenomenon that long-lived cells may contain signatures of past viral replication as the  
483 “fossil record”. To emphasize the concept, the fossil record finding is qualitatively illustrated in **Fig 8**  
484 using a population of 30 infected cells. At 3 time points following the initiation of ART, we compare the  
485 net and current percentage of cells generated by viral replication. At day 60, 30% of cells remain that  
486 were originally generated by viral replication. This means 30% of observed sequences might produce a  
487 signal of evolution. However, at that time an overwhelming majority of new infected cells are being  
488 generated by proliferation.

489

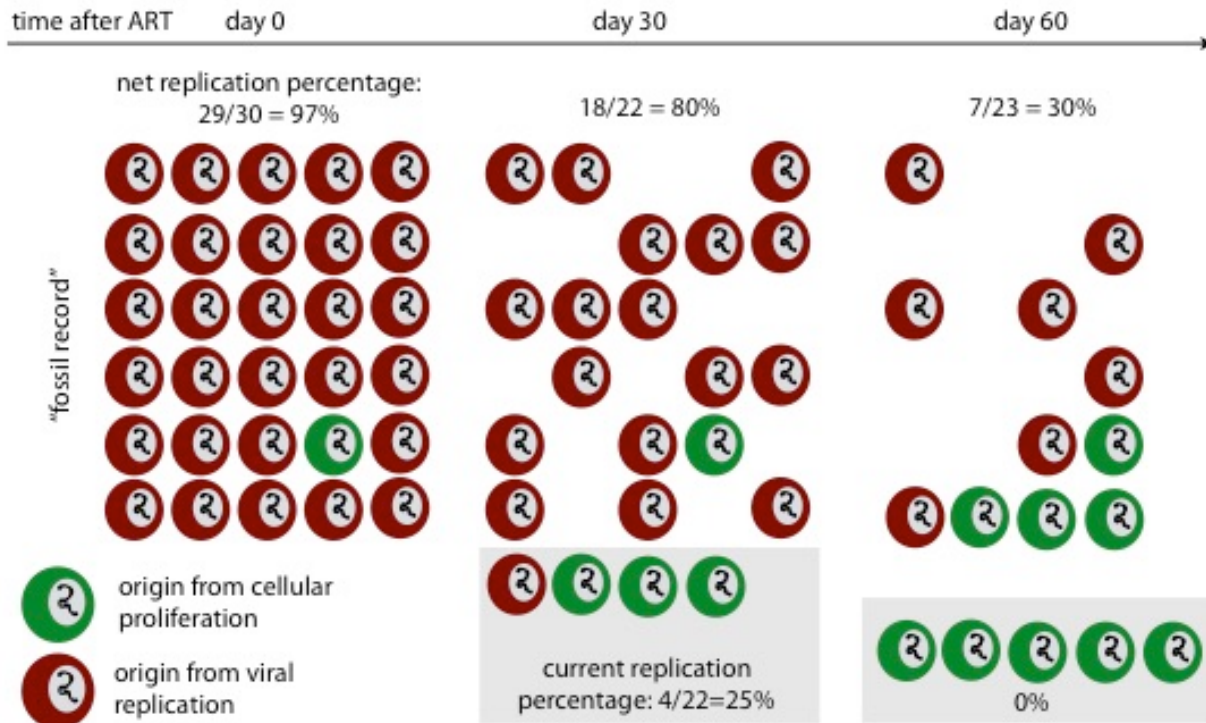

490  
 491 **Figure 8. Qualitative illustration of the fossil record phenomenon.** In an example population of 30  
 492 infected cells, the proportion of infected cells that were once generated by HIV replication (the net  
 493 replication percentage, or "fossil record" of HIV replication) remains >30% for the first 2 months of ART.  
 494 However, in this time, the proportion of cells newly generated by HIV replication (shaded box)  
 495 becomes negligible. The net fraction is observed experimentally, so our simulations indicate a contemporaneous  
 496 representation of the HIV reservoir cannot be observed until the "fossil record" is completely washed out,  
 497 sometime between 6 months and a year of ART.

498  
 499 **Different factors drive net (observed) and current replication percentage during early ART.** We next  
 500 performed sensitivity analyses to identify parameters that impact the timing of transition from HIV  
 501 replication to cellular proliferation as a source for new and observed infected cells. Under all parameter  
 502 assumptions, the majority of new infected cells arose from proliferation after a year of chronic ART (**Fig**  
 503 **9A**). Only the sanctuary decay rate ( $\zeta$ ) had an important impact on generation of new infected cells. Our  
 504 analysis included a sanctuary in which target cell availability did not decay at all. In that scenario, 5-10%  
 505 of new infected cells were generated by HIV replication after a year of ART (**Fig 9A**), which is not  
 506 consistent with lack of viral evolution observed at this timepoint. Rapid disappearance of HIV replication  
 507 as a source of new infected cells was identified regardless of initial reservoir volume, drug sanctuary  
 508 volume, ART efficacy, and reservoir composition (fraction of  $T_{em}$ ,  $T_{cm}$ , and  $T_n$ ).

509  
 510 The net replication percentage was completely unaffected by the decay rate of target cells within the  
 511 drug sanctuary. Only an increase in the percentage of slowly proliferating reservoir cells ( $T_n$ ) predicted  
 512 an increase in the net replication percentage (**Fig 9A**). The drivers of current infected cell and net  
 513 infected cell origin therefore differed completely, highlighting the major differences between observed  
 514 sequence data and contemporaneous mechanisms generating new infected cells.

515

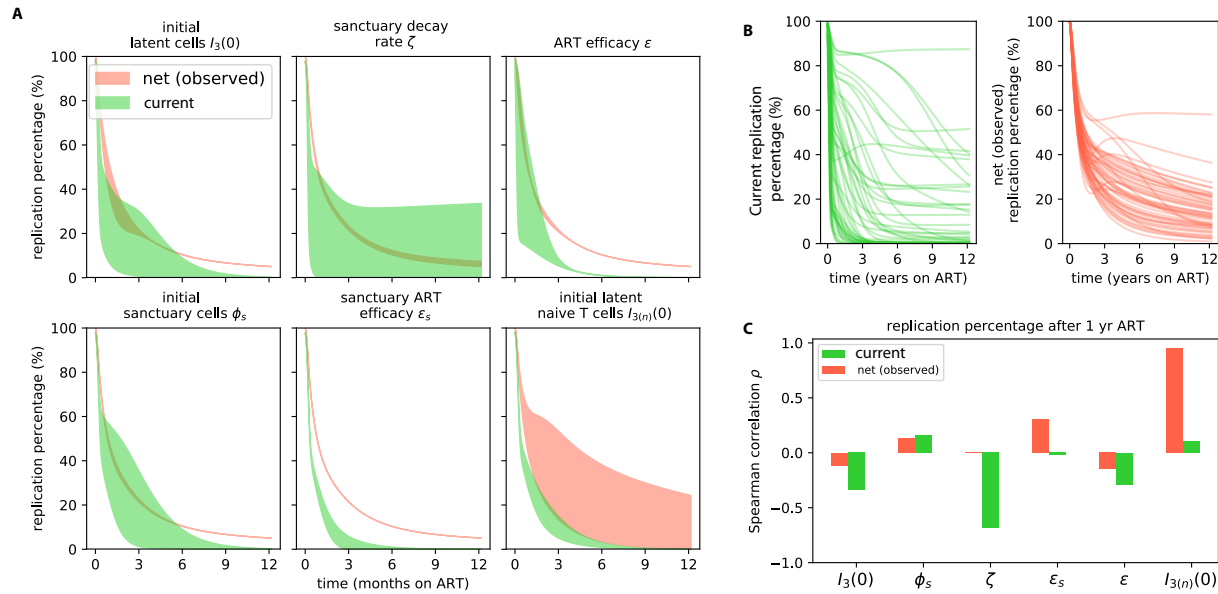

516  
 517 **Figure 9. Transition from replication to proliferation as the dominant mechanism of HIV persistence**  
 518 **during ART occurs under a wide range of parameter assumptions. A-C.** See Methods for complete  
 519 simulated parameter ranges. **A.** Local sensitivity analysis (green: current infection, red: net infection)  
 520 revealed no meaningful difference in percentage of new infected cells generated by viral replication after  
 521 a year of ART despite variability in initial reservoir volume  $I_3(0)$ , sanctuary fraction  $\phi_s$ , and ART  
 522 effectiveness in and out of the sanctuary ( $\epsilon_s$  and  $\epsilon$ ). Only an extremely low, or zero, sanctuary decay rate  
 523  $\zeta$  predicted that a meaningful percentage (25%) of infected cells would be newly generated by HIV  
 524 replication at one year, despite the fact that signals of evolution are not typically observed at this  
 525 timepoint. Including a high percentage of slowly proliferating naïve CD4+ T cells ( $T_n$ ) in the reservoir  
 526 alters the percentage of net, but not current, replication percentage. **B.** 50 examples from 1,000 global  
 527 sensitivity analysis simulations. HIV replication accounted for fewer than 25% of current and net infected  
 528 cells after a year of ART in a majority of simulations. **C.** The parameters most correlated with current and  
 529 net replication percentage at 1 year of ART are different. Current replication percentage inversely  
 530 correlates with sanctuary decay rate while net (observed) replication percentage positively correlates  
 531 with reservoir composition (the fraction of naïve latently infected cells). Correlations are measured with a  
 532 Spearman correlation coefficient.

533  
 534 To confirm these results, we simulated  $10^4$  possible patients in a global sensitivity analysis in which all  
 535 parameter values were simultaneously varied. A rapid transition to proliferation as the source of new  
 536 infected cells occurred during year one of ART in a majority of simulated patients, and the same  
 537 variables correlated significantly with net and current replication percentage, respectively (**Fig 9B&C**).  
 538 Overall, this analysis does not rule out the possibility of a drug sanctuary but does confirm that its  
 539 relative impact compared to cellular proliferation is likely to be minimal.

## 540 Discussion

541 To eliminate HIV infected cells during prolonged ART, it is necessary to understand the mechanisms by  
 542 which they persist. In this paper, we used existing data and two methods – inference of HIV clone  
 543 distributions and mechanistic mathematical modeling – to determine that a majority of infected cell  
 544 persistence is due to cellular proliferation rather than HIV replication. These conclusions suggest  
 545 strategies that enhance ART delivery to anatomic drug sanctuaries are less likely to be effective at

546 reducing infected cell burden relative to reservoir reduction strategies. In particular, antiproliferative  
547 therapies provide an ideal response to the observed dominance of proliferation.

548

549 In the first part of the paper, we used existing data to infer the true clonal distributions within the entire  
550 reservoir of HIV sequences in infected participants on long term ART. While the raw data indicate  
551 substantial fractions of *observed* singleton sequences, when the total reservoir size is considered, these  
552 observed singletons are revealed to be predominately members of clonal populations. In fact, the HIV  
553 reservoir appears to be defined by a rank-abundance distribution of clone sizes that can be roughly  
554 approximated as a power-law relationship. This distribution implies that a small number of massive  
555 clones, and a massive number of small clones, comprise a large percentage of sequences.

556

557 A power-law distribution can be created when a heterogeneous population grows multiplicatively with a  
558 widely variable growth rate.<sup>55</sup> This suggests that the distribution of clone sizes in the reservoir is likely to  
559 have a mechanistic basis. It is plausible, though unproven, that such variable growth arises from rapid  
560 bursts of CD4+ T cell proliferation due to cognate antigen recognition. HIV integration into tumor  
561 suppression genes could also account for some observed clonal dominance.<sup>36,37</sup> Smaller clones may arise  
562 from homeostatic proliferation, or less frequent exposure to smaller amounts of cognate antigen.

563

564 Another consequence of our inference is that we can more precisely define the mechanism sustaining  
565 equivalent sequences observed in longitudinal samples separated by many years. While we cannot rule  
566 out cellular longevity as a cause of HIV persistence in certain cells, the observation of multiple clonal  
567 sequences could not arise from purely long-lived latently infected cells. In fact, our analysis suggests that  
568 most observed singlet sequences arise from resampling clonal populations that have undergone many  
569 rounds of proliferation.

570

571 The first analysis does not include time-dynamics in the reservoir. Consequently, in the second part of  
572 the paper we develop a mechanistic model to reconcile observations from early and late ART. This  
573 model is the first to include the three main mechanistic hypotheses for reservoir persistence: an ART  
574 sanctuary, long-lived latent cells, and proliferation of latent cells. The model recapitulates known HIV  
575 RNA decay kinetics while tracking cells that originate from ongoing replication and cellular proliferation.

576

577 The model helps to explain how a “fossil record” of evolution would be observed early during ART,  
578 whether or not a small drug sanctuary exists. The model tracks both the fraction of cells that were  
579 generated by viral replication at a given time (current replication percentage) and the fraction that were  
580 generated by viral replication at any time point but are “fossilized” in a long-lived latently infected state  
581 (net, or observed, replication percentage). The net replication percentage remains non-negligible in the  
582 first months of ART even while the current replication percentage drops rapidly. Thus, an observed  
583 sequence that was once created by viral replication (and thus might give a signal of divergence from the  
584 founder virus) can represent a historic replication event rather than current replication. Because time of  
585 detection does not correlate linearly with sequence age, inference of evolution early during ART is  
586 problematic.<sup>20,21</sup> However, the fossil record is transient: within a year of effective ART, observed  
587 phylogenetic data is more likely to represent true reservoir dynamics. Our model agrees with  
588 observations reflecting a lack of contemporaneous HIV evolution after this time.<sup>14,22-27,29,30,36,37</sup>

589

590 Our sensitivity analysis shows that the major variable correlating with higher observed replication  
591 percentages (a larger proportion of slowly proliferating CD4+ T cells in the reservoir) is not the same  
592 variable that correlates with higher new replication percentages (a slower decrease in sanctuary size).  
593 Replication percentage correlates with the amount of ongoing evolution in viral populations. Without



594 requiring any phylogenetic simulation, this simple model provides an explanation for evolution during  
595 the first months of ART and no observed HIV evolution in participants with a year of ART.<sup>14,22-27,29,30,36,37</sup>  
596 If we assume a large drug sanctuary and do not allow it to contract as a result of target cell decline, a  
597 persistent low-level sanctuary would emerge that stabilizes at 6 months and generates ongoing  
598 evolution at later ART timepoints. Notably, this has not been observed in clinical studies.

599  
600 Our modeling results inform experiments in two ways. Using rarefaction, we suggest reasonable sample  
601 sizes to verify our hypotheses experimentally (see **Supplementary Fig 4**). We demonstrate that observed  
602 values of sequence richness and clone size, are substantial underestimates. Current studies only sample  
603 the “tip of the iceberg” of the HIV reservoir. Hundreds of thousands of infected cells from a single time  
604 point would be required to capture true reservoir diversity. This sampling depth could only be feasibly  
605 achieved as part of an autopsy study.

606  
607 By using dynamical modeling, we also demonstrate that the wash-out period for the fossil record of HIV  
608 replication may be up to a year post ART. Thus, we suggest that future reservoir studies are conducted  
609 after this time point to avoid observation of historic evolution rather than contemporaneous dynamics.

610  
611 The work presented here carries several important caveats. Current integration site data is still  
612 uncommon and, while robust, is limited to a handful of participants in only a few studies. Modeling rank  
613 abundance curves makes a large assumption about the continuity of the data. The power law model  
614 represents but one approach, and future work should attempt to uncover why that distribution appears  
615 to provide good fit to the data. Extrapolating abundance curves has been criticized: we note that our  
616 attempt to design a simple parametric model was based on the additional information of reservoir size  
617 and our goal to define an upper limit on reservoir richness;<sup>56</sup> we also emphasize that the tail of our  
618 distributions is impossible to precisely characterize with our methods. Our approach is calibrated against  
619 sequence data from blood. However, the dynamics of HIV within lymph tissue may have different  
620 distributions. While historically, blood samples have been taken as a surrogate for HIV infected cells, we  
621 cannot rule out the possibility that the drug sanctuary that does not exchange virus or infected cells with  
622 blood. This sanctuary would be unobservable until probed anatomically. It seems unlikely that such a  
623 sanctuary could be sustained because some trafficking of CD4+ T cells from other compartments seems  
624 necessary to avoid terminal target cell limitation. However, future studies should address possible one-  
625 way trafficking or local proliferation of target cells.

626  
627 In conclusion, we demonstrate that the majority of HIV infected cells arise from proliferation after the  
628 first year of ART. We have also provided an explanation for incongruent observations of evolution  
629 before and after a year of ART. Because proliferation appears to be the dominant force sustaining the  
630 HIV reservoir,<sup>34</sup> we suggest limiting proliferation as a prime therapeutic target.<sup>10,11,57</sup>

## 631 **Methods**

632 **Rank abundance of HIV integration sites.** We used an ecological framework to study the abundance of  
633 clonal HIV. To do so, we applied methods to integration site and replication competent HIV sequence  
634 data. Cellular DNA found with HIV integrated into different integration sites in the human genome were  
635 defined as distinct “clones”. The number of times a cell was found with the same integration site added  
636 to the “abundance” of that clone. By ordering (ranking) the clones from largest to smallest by  
637 abundance, we developed a rank abundance curve,  $a(r)$ , for each participant time point. No  
638 assumptions were made about the stability or dynamics of the reservoir rank abundance over time.

639



640 In our analysis of data from Wagner *et al.*,<sup>37</sup> we combine measurements taken closely in time and use  
641 the median time point as done in that published paper. In our analysis of Maldarelli *et al.*,<sup>36</sup> we grouped  
642 by integration site, or nearest measured integration site when integration site was not noted. It is  
643 important to note that the methods used by Wagner *et al.* and Maldarelli *et al.* are slightly different. The  
644 ISLA method used by Wagner *et al.* is lower throughput than the next generation shotgun sequencing  
645 method used by Maldarelli *et al.* The absolute number of viruses identified by each group therefore  
646 differs. However, the percentage of observed singletons is similar between the two studies.

647  
648 We manually counted the abundance of replication competent HIV sequences using phylogenetic trees  
649 in Hosmane *et al.*<sup>34</sup>

650  
651 **Calculation of rarefaction curves.** We used rarefaction curves to estimate the expected number of  
652 distinct sequences that would still be present in a subsample of  $k$  sequences from the observed data  
653 with sample size of  $N$ :

$$654 \langle n_k \rangle = R^{obs} - \binom{N}{k}^{-1} \sum_{r=1}^{R^{obs}} \binom{N-a(r)}{k}, \quad (1)$$

655  
656 where the parentheses indicate binomial coefficients, e.g.  $\binom{N}{k} = \frac{N!}{k!(N-k)!}$ . Later, we extrapolated  
657 rarefaction curves using the modeled distributions for the total reservoir size  $L$ . Because the number of  
658 samples we allowed was orders of magnitude smaller than the number of cells in the reservoir,  $k \ll L$ ,  
659 we used Stirling's approximation to simplify the binomial coefficients. The expected number of  
660 sequences after  $k$  samples is then

$$661 \langle \tilde{n}_k \rangle = R - \sum_{r=1}^R \left[ 1 - \frac{a(r)}{L} \right]^k, \quad (2)$$

662  
663 an expression which avoids computation of large factorials (derivation in the **Supplementary Methods**).

664  
665 **Nonparametric estimation of species richness.** We employed the Chao1 estimator to set a lower bound  
666 on the sequence or integration site richness.<sup>58</sup> A derivation of the estimator is included in the  
667 **Supplementary Methods**. Chao1 is not a mechanistic model and requires no free parameters. Inference  
668 relies on only the number of observed singleton ( $N_1$ ) and observed doubleton ( $N_2$ ) sequences such that  
669

$$670 R^{Chao1} = R^{obs} + \frac{N_1(N_1-1)}{2(N_2+1)}. \quad (3)$$

671  
672 We display an asymmetric confidence interval in **Fig 3** (see Chao *et al.*<sup>58</sup> or **Supplementary Methods** for  
673 the calculation). We also note it is possible the data are undersampled to the extent that a one-sided  
674 confidence interval may be more appropriate. Thus, for our biological conclusions we take the Chao1  
675 point estimate as a lower bound, and constrain the upper bound using the parametric model (**Eq 4**).  
676 Other richness estimators (jackknife 1 and 2) were tested but provided similar and consistently lower  
677 estimates of richness than the Chao1 estimator. These were not included in our results because the  
678 Chao1 was interpreted as a lower bound on true sequence richness.

679  
680 **Parametric models to extrapolate sequence abundance curves.** Estimates of the size of the HIV  
681 reservoir (both replication competent and total) were gathered from the published literature.<sup>33</sup> We then  
682 developed a parametric model to quantify the true rank abundance distribution of the complete HIV  
683 reservoir. Examination of the data indicated a possible log-log-linear relationship, so we chose a discrete  
684  
685

686 integer power law model so that the probability of a rank is described by  $p(r) = \psi(R)r^{-\alpha}$  where the  
687 coefficient  $\psi(R) = \sum_{r=1}^R r^{-\alpha}$  is the normalization constant for the power law. Then, to describe the true  
688 rank abundance  $a(r)$  we chose the reservoir size depending on the model context (replication  
689 competent  $L = 10^7$  or total HIV DNA  $L = 10^9$ ). To ensure integer number of cells, we rounded this  
690 distribution, and forced the total number of cells to equal the reservoir size. That is,

$$691 \quad a(r; \alpha, R, L) = \lfloor [L\psi(R)r^{-\alpha}] \rfloor \quad (4)$$

692  
693 where  $\lfloor \cdot \rfloor$  indicates rounding to the nearest integer. Thus, our model depended on two free  
694 parameters, a power law exponent  $\alpha$ , and the reservoir richness  $R$ . Other functional forms were  
695 explored but simplicity and accurate reproduction of the data were optimal with the power law.  
696  
697

698 **Fitting the rank-abundance model to experimental data.** Using the experimental data we found the  
699 best-fit model using the following procedure. We fixed the reservoir size  $L$  depending on the model  
700 context (replication competent or total HIV DNA). We chose a value for  $R$  and  $\alpha$  from ranges  $R \in$   
701  $[10^3, 10^7]$  and  $\alpha \in [0, 2]$  to specify the model. Then, we sampled the extrapolated distribution 10 times  
702 using multinomial sampling with the same number of samples as the experimental data being fit,  
703  $\mathcal{M}(N^{obs}, p(r))$ . This procedure assumes that sampling cells does not change the distribution of the  
704 reservoir, which is reasonable given the reservoir size. Each sampled data set was compared to the  
705 experimental data by computing the residual sum of squares (rss) error of the cumulative proportional  
706 abundance (cpa) curves. For each model then, the reported error is the average rss over the 10  
707 resamplings. Because the rss error is not symmetric across the domain of the cpa, this approach  
708 becomes similar to minimizing the Kolmogorov-Smirnov (KS) statistic: the maximum deviation between  
709 two cumulative distributions. For each experimental data set, 2500 model parameter sets were  
710 generated, and fitting results are visualized as heat maps (see **Figs 4A, 5A** for example). Because the  
711 procedure becomes computationally expensive as  $R > 10^7$ , we did not explore values above this  
712 threshold. In theory, it is possible to have a distribution with all clones having a single member  $R =$   
713  $L, \alpha = 0$ . For the total DNA reservoir, this value would result in  $R = 10^9$ . However, this model was never  
714 optimal. In fact, as richness increased beyond  $R \approx 10^6$ , the model was no longer sensitive to  $R$ . Thus, it  
715 appeared that finding the best fit  $\alpha$  was sufficient to specify the model if proper bounds on richness  
716 were included.  
717

718 We excluded models where  $R < R^{Chao1}$ , but we also sought to identify an upper bound for  $R$ . Indeed,  
719 certain model parameter combinations are mathematically impossible. For example, for a given power  
720 law exponent, the richness is constrained below a certain value for a given reservoir size. This  
721 observation has been considered previously in ecology under the terminology of ‘feasible sets’.<sup>59</sup> To  
722 determine the largest possible richness that still has the best fit, we chose the roughly constant value of  
723  $\alpha$  that emerged when  $R$  was large enough to be unidentifiable. Then, we noted that for large  $R$  it is a  
724 reasonable approximation to allow  $\sum_{r=1}^R a(r) = \int_1^R a(r) dr$ .  $R$  is thus approximately bounded, and we  
725 solved for the maximal value or the upper bound on the richness given the best fit  $\alpha$  and the chosen  $L$ . A  
726 discussion and numerical validation of this approximation is presented in the **Supplementary Methods**  
727 and **Supplementary Fig 2**. The upper bound provides the sequence abundance most permissive of true  
728 singleton sequences – the reservoir with the most evidence of HIV replication as opposed to  
729 proliferation. In extrapolated reservoirs, we used the maximum richness model to ensure we were  
730 biasing the results as strongly as possible against our own hypothesis.  
731

732 **Model fitting validation with simulated data.** A discussion and demonstration of model validation is  
733 included in the **Supplementary Methods** and **Supplementary Fig 1**. The exercise shows that simply  
734 fitting a power law to the experimental data (using log-log-linear regression) without the extra sampling  
735 step necessarily underestimates the power-law exponent, demonstrating the utility of our approach.  
736 Moreover, it shows that a published maximum likelihood approach<sup>60</sup> is not as accurate for these data as  
737 our resampling approach (code hosted at <http://tuvalu.santafe.edu/~aaronc/powerlaws/> last accessed  
738 July 2018) . We simulated a reservoir with known power law exponent **Supplementary Fig 1A** and tested  
739 for recovery of this known value. The fitting validation proceeded identically to the data fitting, 2500  
740 distributions were generated (225 examples are shown in **Supplementary Fig 1D**), the simulated data  
741 was sampled **Supplementary Fig 1B**, and reranked **Supplementary Fig 1C**. Fitting results **Supplementary**  
742 **Fig 1E&F** are shown analogous to **Figs 4&5,A&B**. Finally, the most correct parameter estimation of three  
743 methods tried came from our modeling approach **Supplementary Fig 1G**.  
744

745 **Mechanistic model for the persistence of the HIV reservoir.** The canonical model for HIV dynamics  
746 describes the time-evolution of the concentrations of susceptible  $S$  and infected  $I$  CD4+ T cells and HIV  
747 virus  $V$ .<sup>50,54,61</sup> Our model grows from the canonical model, simplifying with several approximations and  
748 extending the biological detail to simulate HIV dynamics on ART, including a long-lived latent reservoir  
749 and a potential drug sanctuary. Perelson *et al.* first noticed and quantified a ‘biphasic’ clearance of HIV  
750 virus upon initiation of ART and showed that viral half-lives of 1.5 and 14 days correspond with the half-  
751 lives of two infected cell compartments.<sup>50,54</sup> With longer observation times and single-copy viral assays,  
752 Palmer *et al.* found four-phases of viral clearance after initiation of ART.<sup>51</sup> Because of uncertainty in  
753 distinguishing the third and fourth phase in that study, we focus on the first three decay rates and  
754 corresponding cellular compartments, attributing a mixture of the third and fourth phase decay to the  
755 clearance of the productively infectious latent reservoir (half-life 44 months) as measured by Siliciano *et*  
756 *al.* and recently corroborated by Crooks *et al.*<sup>2,3</sup> and the clearance of HIV DNA.<sup>47</sup> We developed a  
757 mechanistic mathematical model that has three types of infected cells  $I_1, I_2, I_3$  that are meant to  
758 simulate productively infected cells, pre-integration infected cells, and latently infected cells,  
759 respectively. We classify rapid death  $\delta_1$  and viral production within actively infected cells  $I_1$ . Cells with  
760 longer half-life that may represent pre-integration infected cells  $I_2$  are activated to  $I_1$  at rate  $\xi_2$ .  $I_2$  may  
761 represent CD4+ T cells with a prolonged pre-integration phase, but their precise biology does not affect  
762 model outcomes.<sup>48</sup>  
763

764 The state  $I_{3(j)}$  represents latently infected reservoir cells of phenotype  $j$ , which contain a single  
765 chromosomally integrated HIV DNA provirus.<sup>44</sup>  $I_3$  reactivates to  $I_1$  at rate  $\xi_3$  which at present is assumed  
766 to be constant across cell phenotypes.<sup>49</sup> The probabilities of a newly infected cell entering  $I_1, I_2, I_{3(j)}$ , are  
767  $\tau_1, \tau_2, \tau_{3(j)}$ . Because we are focused on the role of proliferation, we assume sub-populations of  $I_3$ ,<sup>12</sup>  
768 including effector memory ( $T_{em}$ ), central memory ( $T_{cm}$ ), and naïve ( $T_n$ ) CD4+ T cells, which proliferate and  
769 die at different rates  $\alpha_{3(j)}, \delta_{3(j)}$ .<sup>12,42,43</sup> Parameter values and initial conditions for the model are  
770 collected in **Table 1**.  
771

772 **Including a decreasing sanctuary in the model.** A recent hypothesis about reservoir persistence  
773 suggests there may be a small, anatomic sanctuary (1 in  $10^5$  infected cells) in which ART is not  
774 therapeutic.<sup>4</sup> Thus, we included the state variable  $I_S$  that is maintained at a constant set-point level prior  
775 to ART, where all new infected cells arise from ongoing replication. We opted for this simplification  
776 because it biased against our conclusions. The amount of virus produced by the sanctuary  $V_S$  is  
777 extremely low relative to non-sanctuary regions because ART results in levels undetectable by sensitive  
778 assays.<sup>51</sup>  
779

780 Many studies have demonstrated that HIV accelerates immunosenescence through abnormal activation  
 781 of CD4+ T cells.<sup>62-64</sup> ART results in a marked reduction of T cell activation and apoptosis, a potential  
 782 signature of HIV susceptible cells.<sup>65</sup> By examining the decline of activation markers for CD4+ T cells, we  
 783 approximated the decay kinetics of activated T cells upon ART, inferring approximate decay kinetics of  
 784 the target cells in our model.<sup>52,53,66</sup> A range of initial values exists (from ~5–20% activation) depending  
 785 on stage of HIV infection, yet after a year of ART, a large percentage of patients return to almost normal,  
 786 or slightly elevated CD4+ T cell activation levels (2-3%).<sup>52</sup> Because we assume that target cell depletion is  
 787 minimal at viral load set-point, we can approximate that the susceptible cell concentration decreases  
 788 over time as the immune activation decreases, i.e.,  $S = S(0)e^{-\zeta t}$ . This single exponential decay is  
 789 simplified (it may be biphasic but the data are not granular enough to discriminate this dynamic  
 790 subtlety). From existing data, the decay constant should be in the range  $\zeta \sim [0.002, 0.01] \text{ day}^{-1}$ .<sup>52,66</sup> We  
 791 extend this decay into the sanctuary, allowing the number of susceptible cells over the whole body to  
 792 decrease so that we have  $I_S = I_1(0)\varphi_S e^{-\zeta t}$  where  $\varphi_S$  is the fraction of infected cells that are in a  
 793 sanctuary. Model simulations are also performed without this assumption of target cell contraction.

794  
 795 Last, we use the quasi-static approximation that virus is proportional to the number of actively infected  
 796 cells in all compartments  $V = n(I_1 + I_S)$  where  $n = \pi/\gamma$ , the ratio of the viral production rate to the  
 797 viral clearance rate (**Table 1**). The model is thus

$$\begin{aligned} \dot{I}_1 &= \tau_1 \beta_\epsilon SV - \delta_1 I_1 + \xi_2 I_2 + \sum_j \xi_3 I_{3(j)} \\ \dot{I}_2 &= \tau_2 \beta_\epsilon SV + (\alpha_2 - \delta_2 - \xi_2) I_2 \\ \dot{I}_{3(j)} &= \tau_{3(j)} \beta_\epsilon SV + (\alpha_{3(j)} - \delta_{3(j)} - \xi_3) I_{3(j)} \end{aligned} \quad (5)$$

803 where we use the over-dot to denote the time derivative.

804  
 805 **Comparing proliferation and viral replication: ‘net’ and ‘current’ percentages.** By solving the ODE  
 806 model (**Eq 6**), we have the time solution for each infected cell state. From these, we can compute the  
 807 total number of newly infected cells generated in a given time interval  $\Delta t$  by ongoing replication. That  
 808 value is  $I^{rep}(t) = (\beta_\epsilon SV + \phi_S \beta_S V_S) \Delta t$ . The total number of newly infected cells generated by  
 809 proliferation of a previously infected cell can be computed similarly in a time interval as  $I^{pro}(t) =$   
 810  $\sum_{i(j)} \alpha_{i(j)} I_{i(j)} \Delta t$ . Therefore, the percentage of infected cells generated by current replication is written

$$\Phi^{current}(t) = 100 \cdot \frac{I^{rep}(t)}{I^{rep}(t) + I^{pro}(t)}. \quad (6)$$

814 We can further subset this newly generated fraction by examining the percentage of newly infected cells  
 815 that enter the long-lived latent state  $I_3$  by defining  $I^{rep(3)}(t) = \tau_3 (\beta_\epsilon SV + \phi_S \beta_S V_S) \Delta t$  and  $I^{pro(3)}(t) =$   
 816  $\sum_j \alpha_{3(j)} I_{3(j)} \Delta t$  so that

$$\Phi^{current(3)}(t) = 100 \cdot \frac{I^{rep(3)}(t)}{I^{rep(3)}(t) + I^{pro(3)}(t)}. \quad (7)$$

819  
 820 The net (or observed) replication percentage, is the fraction of cells that remain that were once  
 821 generated by viral replication. To compute this quantity, we use an additional set of ODEs that we refer  
 822 to as “tracking equations” because they do not change the dynamics of the system, and only are used to  
 823 track specific variables. To denote the net value as opposed to new value we use a subscript  $\Sigma$ . The net  
 824 cells generated by viral replication in state  $i$  of phenotype  $j$  is governed by the differential equation

825

$$826 \quad \dot{I}_{i(j)}^{(\Sigma)rep} = \tau_{i(j)}\beta_{\epsilon}SV - (\delta_{i(j)} - \xi_{i(j)})I_{i(j)}^{(\Sigma)rep}. \quad (8)$$

827

828 Likewise, the net cells generated by proliferation in state  $i$  of phenotype  $j$  is governed by the differential  
829 equation

830

$$831 \quad \dot{I}_{i(j)}^{(\Sigma)pro} = \alpha_{i(j)}I_{i(j)} - (\delta_{i(j)} - \xi_{i(j)})I_{i(j)}^{(\Sigma)pro}. \quad (9)$$

832

833 We note that because we only allow these two mechanisms,  $\dot{I}_{i(j)} = \dot{I}_{i(j)}^{(\Sigma)rep} + \dot{I}_{i(j)}^{(\Sigma)pro}$  and

834  $I_{i(j)}(t) = I_{i(j)}^{(\Sigma)rep}(t) + I_{i(j)}^{(\Sigma)pro}(t)$ . By solving the tracking equations separately, we can then find the net

835 replication percentage by summing over cell types and phenotypes to ultimately write

836

$$837 \quad \Phi^{\Sigma}(t) = 100 \cdot \frac{\sum_{i(j)} I_{i(j)}^{(\Sigma)rep}(t)}{\sum_{i(j)} I_{i(j)}^{(\Sigma)rep}(t) + I_{i(j)}^{(\Sigma)pro}(t)}. \quad (10)$$

838

839 In all simulations, we assumed that 100% of infected cells at the initiation of ART were generated by  
840 viral replication, that is  $\Phi^{\Sigma}(0) = 100$ . This assumption biases results in favor of replication. However,  
841 we choose it because, to the best of our knowledge, studies of proliferation during chronic untreated  
842 HIV have not been performed.

843

844 **Sensitivity analysis.** Using estimated parameter bounds [lower, upper], we completed a local and global  
845 sensitivity analysis. These ranges were chosen to cover a wide range of possible assumptions. We  
846 allowed  $I_3(0) = [0.02, 2]$  cells  $\mu\text{L}^{-1}$ ,  $\varphi_S = [10^{-6}, 10^{-4}]$  unitless,  $\zeta = [0, 0.2]$   $\text{day}^{-1}$ ,  $\epsilon = [0.9, 0.99]$   
847 unitless,  $\epsilon_S = [0, 0.9]$  unitless,  $I_{3(n)}(0) = [0, 0.5] \times I_3(0)$  cells  $\mu\text{L}^{-1}$ . For the local analysis, we used all  
848 values as in **Table 1** and modified one parameter at a time over each listed range above. The global  
849 analysis was performed by using  $10^4$  Latin Hypercube samplings of the complete 6-dimensional  
850 parameter space.<sup>67</sup> The key outcome, the replication percentage (net and current) at 1 year of ART, was  
851 correlated to each parameter using the Spearman correlation coefficient—defined by the ratio of the  
852 covariance between the outcome and the variable divided by the standard deviations of each when the  
853 variables were rank-ordered by value.

854

855 **Data and code availability.** Computational code for all calculations and simulations was performed in  
856 Python and Matlab and can be found at [https://github.com/dbrvs/reservoir\\_persistence](https://github.com/dbrvs/reservoir_persistence). Sequence  
857 data was obtained from the Retrovirus Integration Database (RID).<sup>68</sup>

## 858 References

- 859 1. Volberding, P.A. & Deeks, S.G. Antiretroviral therapy and management of HIV infection.  
860 *Lancet* **376**, 49-62 (2010).
- 861 2. Crooks, A.M., *et al.* Precise Quantitation of the Latent HIV-1 Reservoir: Implications for  
862 Eradication Strategies. *J Infect Dis* **212**, 1361-1365 (2015).
- 863 3. Siliciano, J.D., *et al.* Long-term follow-up studies confirm the stability of the latent  
864 reservoir for HIV-1 in resting CD4+ T cells. *Nat Med* **9**, 727-728 (2003).
- 865 4. Lorenzo-Redondo, R., *et al.* Persistent HIV-1 replication maintains the tissue reservoir  
866 during therapy. *Nature* **530**, 51-56 (2016).



- 867 5. Gunthard, H.F., *et al.* Evolution of envelope sequences of human immunodeficiency  
868 virus type 1 in cellular reservoirs in the setting of potent antiviral therapy. *J Virol* **73**,  
869 9404-9412 (1999).
- 870 6. Finzi, D., *et al.* Identification of a reservoir for HIV-1 in patients on highly active  
871 antiretroviral therapy. *Science* **278**, 1295-1300 (1997).
- 872 7. Finzi, D., *et al.* Latent infection of CD4+ T cells provides a mechanism for lifelong  
873 persistence of HIV-1, even in patients on effective combination therapy. *Nat Med* **5**,  
874 512-517 (1999).
- 875 8. Fletcher, C.V., *et al.* Persistent HIV-1 replication is associated with lower antiretroviral  
876 drug concentrations in lymphatic tissues. *Proc Natl Acad Sci U S A* **111**, 2307-2312  
877 (2014).
- 878 9. Archin, N.M., *et al.* Administration of vorinostat disrupts HIV-1 latency in patients on  
879 antiretroviral therapy. *Nature* **487**, 482-485 (2012).
- 880 10. Chapuis, A.G., *et al.* Effects of mycophenolic acid on human immunodeficiency virus  
881 infection in vitro and in vivo. *Nat Med* **6**, 762-768 (2000).
- 882 11. Garcia, F., *et al.* Effect of mycophenolate mofetil on immune response and plasma and  
883 lymphatic tissue viral load during and after interruption of highly active antiretroviral  
884 therapy for patients with chronic HIV infection: a randomized pilot study. *J Acquir*  
885 *Immune Defic Syndr* **36**, 823-830 (2004).
- 886 12. Chomont, N., *et al.* HIV reservoir size and persistence are driven by T cell survival and  
887 homeostatic proliferation. *Nat Med* **15**, 893-900 (2009).
- 888 13. Maldarelli, F., *et al.* HIV populations are large and accumulate high genetic diversity in a  
889 nonlinear fashion. *J Virol* **87**, 10313-10323 (2013).
- 890 14. Nickle, D.C., *et al.* Evolutionary indicators of human immunodeficiency virus type 1  
891 reservoirs and compartments. *J Virol* **77**, 5540-5546 (2003).
- 892 15. Sanjuan, R. & Domingo-Calap, P. Mechanisms of viral mutation. *Cell Mol Life Sci* **73**,  
893 4433-4448 (2016).
- 894 16. Poon, A.F., *et al.* Reconstructing the dynamics of HIV evolution within hosts from serial  
895 deep sequence data. *PLoS Comput Biol* **8**, e1002753 (2012).
- 896 17. Zanini, F., *et al.* Population genomics of inpatient HIV-1 evolution. *Elife* **4**(2015).
- 897 18. Shankarappa, R., *et al.* Consistent viral evolutionary changes associated with the  
898 progression of human immunodeficiency virus type 1 infection. *J Virol* **73**, 10489-10502  
899 (1999).
- 900 19. Lemey, P., *et al.* Synonymous substitution rates predict HIV disease progression as a  
901 result of underlying replication dynamics. *PLoS Comput Biol* **3**, e29 (2007).
- 902 20. Kearney, M.F.W., A.; Shao, W.; McManus W.R.; Bale, M.J.; Luke, B.; Maldarelli, F.;  
903 Mellors, J.M.; Coffin, J.M. Ongoing HIV Replication During ART Reconsidered. *Open*  
904 *Forum Infectious Diseases* **4**, ofx173 (2017).
- 905 21. Rosenbloom, D.I.S., Hill, A.L., Laskey, S.B. & Siliciano, R.F. Re-evaluating evolution in the  
906 HIV reservoir. *Nature* **551**, E6-E9 (2017).
- 907 22. Evering, T.H., *et al.* Absence of HIV-1 evolution in the gut-associated lymphoid tissue  
908 from patients on combination antiviral therapy initiated during primary infection. *PLoS*  
909 *Pathog* **8**, e1002506 (2012).



- 910 23. Frenkel, L.M., *et al.* Multiple viral genetic analyses detect low-level human  
911 immunodeficiency virus type 1 replication during effective highly active antiretroviral  
912 therapy. *J Virol* **77**, 5721-5730 (2003).
- 913 24. Josefsson, L., *et al.* The HIV-1 reservoir in eight patients on long-term suppressive  
914 antiretroviral therapy is stable with few genetic changes over time. *Proc Natl Acad Sci U*  
915 *S A* **110**, E4987-4996 (2013).
- 916 25. Kearney, M.F., *et al.* Lack of detectable HIV-1 molecular evolution during suppressive  
917 antiretroviral therapy. *PLoS Pathog* **10**, e1004010 (2014).
- 918 26. Rothenberger, M.K., *et al.* Large number of rebounding/founder HIV variants emerge  
919 from multifocal infection in lymphatic tissues after treatment interruption. *Proc Natl*  
920 *Acad Sci U S A* **112**, E1126-1134 (2015).
- 921 27. Brodin, J., *et al.* Establishment and stability of the latent HIV-1 DNA reservoir. *Elife*  
922 **5**(2016).
- 923 28. Bull, M.E., *et al.* Monotypic human immunodeficiency virus type 1 genotypes across the  
924 uterine cervix and in blood suggest proliferation of cells with provirus. *J Virol* **83**, 6020-  
925 6028 (2009).
- 926 29. von Stockenstrom, S., *et al.* Longitudinal Genetic Characterization Reveals That Cell  
927 Proliferation Maintains a Persistent HIV Type 1 DNA Pool During Effective HIV Therapy. *J*  
928 *Infect Dis* **212**, 596-607 (2015).
- 929 30. Wagner, T.A., *et al.* An increasing proportion of monotypic HIV-1 DNA sequences during  
930 antiretroviral treatment suggests proliferation of HIV-infected cells. *J Virol* **87**, 1770-  
931 1778 (2013).
- 932 31. Alizon, S. & Fraser, C. Within-host and between-host evolutionary rates across the HIV-1  
933 genome. *Retrovirology* **10**, 49 (2013).
- 934 32. Bruner, K.M., *et al.* Defective proviruses rapidly accumulate during acute HIV-1  
935 infection. *Nat Med* **22**, 1043-1049 (2016).
- 936 33. Ho, Y.C., *et al.* Replication-competent noninduced proviruses in the latent reservoir  
937 increase barrier to HIV-1 cure. *Cell* **155**, 540-551 (2013).
- 938 34. Hosmane, N.N., *et al.* Proliferation of latently infected CD4+ T cells carrying replication-  
939 competent HIV-1: Potential role in latent reservoir dynamics. *J Exp Med* **214**, 959-972  
940 (2017).
- 941 35. Joos, B., *et al.* HIV rebounds from latently infected cells, rather than from continuing  
942 low-level replication. *Proc Natl Acad Sci U S A* **105**, 16725-16730 (2008).
- 943 36. Maldarelli, F., *et al.* HIV latency. Specific HIV integration sites are linked to clonal  
944 expansion and persistence of infected cells. *Science* **345**, 179-183 (2014).
- 945 37. Wagner, T.A., *et al.* HIV latency. Proliferation of cells with HIV integrated into cancer  
946 genes contributes to persistent infection. *Science* **345**, 570-573 (2014).
- 947 38. Boritz, E.A., *et al.* Multiple Origins of Virus Persistence during Natural Control of HIV  
948 Infection. *Cell* **166**, 1004-1015 (2016).
- 949 39. Cohn, L.B., *et al.* HIV-1 integration landscape during latent and active infection. *Cell* **160**,  
950 420-432 (2015).
- 951 40. Simonetti, F.R., *et al.* Clonally expanded CD4+ T cells can produce infectious HIV-1 in  
952 vivo. *Proc Natl Acad Sci U S A* **113**, 1883-1888 (2016).

- 953 41. Schroder, A.R., *et al.* HIV-1 integration in the human genome favors active genes and  
954 local hotspots. *Cell* **110**, 521-529 (2002).
- 955 42. Macallan, D.C., *et al.* Rapid turnover of effector-memory CD4(+) T cells in healthy  
956 humans. *J Exp Med* **200**, 255-260 (2004).
- 957 43. McCune, J.M., *et al.* Factors influencing T-cell turnover in HIV-1-seropositive patients. *J*  
958 *Clin Invest* **105**, R1-8 (2000).
- 959 44. Josefsson, L., *et al.* Single cell analysis of lymph node tissue from HIV-1 infected patients  
960 reveals that the majority of CD4+ T-cells contain one HIV-1 DNA molecule. *PLoS Pathog*  
961 **9**, e1003432 (2013).
- 962 45. Eren, M.I., Chao, A., Hwang, W.H. & Colwell, R.K. Estimating the richness of a population  
963 when the maximum number of classes is fixed: a nonparametric solution to an  
964 archaeological problem. *PLoS One* **7**, e34179 (2012).
- 965 46. Seymour, A.M. Imaging cardiac metabolism in heart failure: the potential of NMR  
966 spectroscopy in the era of metabolism revisited. *Heart Lung Circ* **12**, 25-30 (2003).
- 967 47. Besson, G.J., *et al.* HIV-1 DNA decay dynamics in blood during more than a decade of  
968 suppressive antiretroviral therapy. *Clin Infect Dis* **59**, 1312-1321 (2014).
- 969 48. Cardozo, E.F., *et al.* Treatment with integrase inhibitor suggests a new interpretation of  
970 HIV RNA decay curves that reveals a subset of cells with slow integration. *PLoS Pathog*  
971 **13**, e1006478 (2017).
- 972 49. Hill, A.L., Rosenbloom, D.I., Fu, F., Nowak, M.A. & Siliciano, R.F. Predicting the outcomes  
973 of treatment to eradicate the latent reservoir for HIV-1. *Proc Natl Acad Sci U S A* **111**,  
974 13475-13480 (2014).
- 975 50. Perelson, A.S., *et al.* Decay characteristics of HIV-1-infected compartments during  
976 combination therapy. *Nature* **387**, 188-191 (1997).
- 977 51. Palmer, S., *et al.* Low-level viremia persists for at least 7 years in patients on suppressive  
978 antiretroviral therapy. *Proc Natl Acad Sci U S A* **105**, 3879-3884 (2008).
- 979 52. Hunt, P.W., *et al.* T cell activation is associated with lower CD4+ T cell gains in human  
980 immunodeficiency virus-infected patients with sustained viral suppression during  
981 antiretroviral therapy. *J Infect Dis* **187**, 1534-1543 (2003).
- 982 53. Kaufmann, G.R., *et al.* Rapid restoration of CD4 T cell subsets in subjects receiving  
983 antiretroviral therapy during primary HIV-1 infection. *AIDS* **14**, 2643-2651 (2000).
- 984 54. Perelson, A.S., Neumann, A.U., Markowitz, M., Leonard, J.M. & Ho, D.D. HIV-1 dynamics  
985 in vivo: virion clearance rate, infected cell life-span, and viral generation time. *Science*  
986 **271**, 1582-1586 (1996).
- 987 55. M., M. A brief history of generative models for power law and lognormal distributions.  
988 *Internet Mathematics* **1(2)**, 226-251. (2004).
- 989 56. Willis, A. Extrapolating abundance curves has no predictive power for estimating  
990 microbial biodiversity. *Proc Natl Acad Sci U S A* **113**, E5096 (2016).
- 991 57. Reeves, D.B., *et al.* Anti-proliferative therapy for HIV cure: a compound interest  
992 approach. *Sci Rep* **7**, 4011 (2017).
- 993 58. Chao, A. Estimating the population size for capture-recapture data with unequal  
994 catchability. *Biometrics* **43**, 783-791 (1987).
- 995 59. Locey, K.J. & White, E.P. How species richness and total abundance constrain the  
996 distribution of abundance. *Ecol Lett* **16**, 1177-1185 (2013).

- 997 60. Clauset, A.S., C. R.; Newman, M. E. . Power-law distributions in empirical data. *SIAM*  
998 *Review* **Nov 6;51(4)**, 661-703. (2009).
- 999 61. Perelson, A.S., Kirschner, D.E. & De Boer, R. Dynamics of HIV infection of CD4+ T cells.  
1000 *Math Biosci* **114**, 81-125 (1993).
- 1001 62. Rutishauser, R.L., *et al.* Early and Delayed Antiretroviral Therapy Results in Comparable  
1002 Reductions in CD8+ T Cell Exhaustion Marker Expression. *AIDS Res Hum Retroviruses*  
1003 (2017).
- 1004 63. Serrano-Villar, S., *et al.* HIV-infected individuals with low CD4/CD8 ratio despite effective  
1005 antiretroviral therapy exhibit altered T cell subsets, heightened CD8+ T cell activation,  
1006 and increased risk of non-AIDS morbidity and mortality. *PLoS Pathog* **10**, e1004078  
1007 (2014).
- 1008 64. Cockerham, L.R., *et al.* Programmed death-1 expression on CD4(+) and CD8(+) T cells in  
1009 treated and untreated HIV disease. *AIDS* **28**, 1749-1758 (2014).
- 1010 65. Appay, V. & Sauce, D. Immune activation and inflammation in HIV-1 infection: causes  
1011 and consequences. *J Pathol* **214**, 231-241 (2008).
- 1012 66. Autran, B., *et al.* Positive effects of combined antiretroviral therapy on CD4+ T cell  
1013 homeostasis and function in advanced HIV disease. *Science* **277**, 112-116 (1997).
- 1014 67. Sanchez, M.A. & Blower, S.M. Uncertainty and sensitivity analysis of the basic  
1015 reproductive rate. Tuberculosis as an example. *Am J Epidemiol* **145**, 1127-1137 (1997).
- 1016 68. Shao, W., *et al.* Retrovirus Integration Database (RID): a public database for retroviral  
1017 insertion sites into host genomes. *Retrovirology* **13**, 47 (2016).
- 1018 69. Ribeiro, R.M., *et al.* Estimation of the initial viral growth rate and basic reproductive  
1019 number during acute HIV-1 infection. *J Virol* **84**, 6096-6102 (2010).
- 1020 70. Huang, Y., Liu, D. & Wu, H. Hierarchical Bayesian methods for estimation of parameters  
1021 in a longitudinal HIV dynamic system. *Biometrics* **62**, 413-423 (2006).
- 1022 71. Luo, R., Piovoso, M.J., Martinez-Picado, J. & Zurakowski, R. HIV model parameter  
1023 estimates from interruption trial data including drug efficacy and reservoir dynamics.  
1024 *PLoS One* **7**, e40198 (2012).
- 1025 72. Conway, J.M. & Perelson, A.S. Residual Viremia in Treated HIV+ Individuals. *PLoS*  
1026 *Comput Biol* **12**, e1004677 (2016).
- 1027 73. Ramratnam, B., *et al.* Rapid production and clearance of HIV-1 and hepatitis C virus  
1028 assessed by large volume plasma apheresis. *Lancet* **354**, 1782-1785 (1999).
- 1029 74. Markowitz, M., *et al.* A novel antiviral intervention results in more accurate assessment  
1030 of human immunodeficiency virus type 1 replication dynamics and T-cell decay in vivo. *J*  
1031 *Virol* **77**, 5037-5038 (2003).
- 1032 75. Blankson, J.N., *et al.* Biphasic decay of latently infected CD4+ T cells in acute human  
1033 immunodeficiency virus type 1 infection. *J Infect Dis* **182**, 1636-1642 (2000).
- 1034

## 1035 End Notes

1036 The authors declare no competing interests.

1037

1038 **Acknowledgments.** DBR thanks F Boshier and O Hyrien for many illuminating conversations and JM  
1039 Drake for originally suggesting the Chao1 estimator. DBR is supported by a Washington Research

1040 Foundation (WRF) Postdoctoral Fellowship. ERD is supported by the National Center for Advancing  
 1041 Translational Sciences of the NIH under Award Number KL2 TR002317. JTS is supported by NIH grants:  
 1042 P01 AI030371-24, U19 AI113173-02, R01 AI121129-01, UM1 AI126623, UM1 AI068635.

1043  
 1044 **Author contributions statement.** DBR, ERD, and JTS conceived the study. TAW, SEP, and AMS  
 1045 contributed ideas and data sources for the project. DBR assembled data, wrote all code, performed all  
 1046 calculations, ran the models, and analyzed output data. JTS and DBR wrote the manuscript with  
 1047 contributions from all other authors.

## 1048 Tables

1049 **Table 1: Model parameters**

| Parameter       | Value                              | Meaning                                                                                                                                                                      | Units                                     | Source   |
|-----------------|------------------------------------|------------------------------------------------------------------------------------------------------------------------------------------------------------------------------|-------------------------------------------|----------|
| $R_0$           | 8                                  | Basic reproductive number of HIV                                                                                                                                             | []                                        | 69       |
| $\beta_0$       | $2 \times 10^{-4}$                 | Viral infectivity, used in $\beta_\epsilon = \beta_0(1 - \epsilon)$                                                                                                          | $[\mu\text{L copy}^{-1} \text{day}^{-1}]$ | 61,70,71 |
| $\epsilon$      | 0.95                               | ART efficacy outside the sanctuary                                                                                                                                           | []                                        | 71,72    |
| $\pi$           | $10^3$                             | Viral production rate, used in $n = \pi/\gamma$                                                                                                                              | $[\mu\text{L copy}^{-1} \text{day}^{-1}]$ | 61,70,71 |
| $\gamma$        | 23                                 | Viral clearance rate, used in $n = \pi/\gamma$                                                                                                                               | $[\text{day}^{-1}]$                       | 73       |
| $\alpha_S$      | 150                                | Susceptible cell production rate                                                                                                                                             | $[\mu\text{L copy}^{-1} \text{day}^{-1}]$ | 54,70,71 |
| $\delta_S$      | 0.2                                | Susceptible cell death rate                                                                                                                                                  | $[\text{day}^{-1}]$                       | 61,70,71 |
| $\delta_1$      | 0.8                                | Productively infected cell ( $I_1$ ) clearance rate                                                                                                                          | $[\text{day}^{-1}]$                       | 71,74    |
| $\delta_2$      | 0.02                               | Pre-integration cell ( $I_2$ ) death rate                                                                                                                                    | $[\text{day}^{-1}]$                       | 48,50    |
| $\alpha_2$      | 0.047                              | Pre-integration cell proliferation rate                                                                                                                                      | $[\text{day}^{-1}]$                       | 42       |
| $\xi_2$         | 0.08                               | Pre-integration cell activation rate                                                                                                                                         | $[\text{day}^{-1}]$                       | Fit      |
| $\alpha_{3(j)}$ | [0.047,0.015, 0.002]               | Proliferation rate of latently infected cells<br>$j \in [T_{em}, T_{cm}, T_n]$ phenotypes, respectively                                                                      | $[\text{day}^{-1}]$                       | 42       |
| $\xi_3$         | 0.0003                             | Latent cell activation rate (for all $j$ )                                                                                                                                   | $[\text{day}^{-1}]$                       | Fit      |
| $\delta_{3(j)}$ |                                    | Calculated from latent clearance rate as<br>$\theta_L = \alpha_{3(j)} - \delta_{3(j)} - \xi_3$ where $\theta_L = -5.2 \times 10^{-4}$                                        | $[\text{day}^{-1}]$                       | 2,3      |
| $\tau_{i(j)}$   | [1, $10^{-2}$ , $10^{-4} \rho_j$ ] | Probability of infection of each compartment, taken from y-intercepts in Ref. 50                                                                                             | []                                        | 51       |
| $\rho_j$        | [0.2,0.75,0.05]                    | Fraction of latent infected cells of each phenotype (e.g. from patient #5 in Ref. 12)                                                                                        | $[\text{cells } \mu\text{L}^{-1}]$        | 12       |
| $V(0)$          | $10^2$                             | Initial viral load (from typical set-point value $10^5$ copies/mL)                                                                                                           | $[\text{copy } \mu\text{L}^{-1}]$         | 69       |
| $I_1(0)$        | 2                                  | Initial concentration of productively infected cells, calculated from $I_1(0) = V(0)/n$                                                                                      | $[\text{cells } \mu\text{L}^{-1}]$        | 75       |
| $I_2(0)$        | 0.2                                | Initial concentration of pre-integration infected cells                                                                                                                      | $[\text{cells } \mu\text{L}^{-1}]$        | 75       |
| $I_{3(j)}(0)$   | $0.2 \rho_j$                       | Initial concentration of each latent phenotype, calculated from $\sim 10^6$ latently infected cells in $\sim 5\text{L}$ of blood                                             | $[\text{cells } \mu\text{L}^{-1}]$        | 2,12     |
| $I_S(0)$        | 180                                | Initial concentration of sanctuary cells, calculated from equilibrium model $I_S(0) = \frac{\alpha_S}{\delta_1} - \frac{\delta_S}{n\beta_0(1-\epsilon_S)}$ , e.g. Ref. 56 SI | $[\text{cells } \mu\text{L}^{-1}]$        | Calc     |
| $\zeta$         | 0.007                              | Decay rate of T cell activation                                                                                                                                              | $[\text{day}^{-1}]$                       | 52       |
| $\epsilon_S$    | 0                                  | ART efficacy in the sanctuary, minimum value                                                                                                                                 | []                                        | Min      |
| $\varphi_S$     | $10^{-5}$                          | Fraction of cells in sanctuary                                                                                                                                               | []                                        | 4        |

1050
